## **Improving the robustness of engineered bacteria to nutrient stress using programmed proteolysis**

Klara Szydło<sup>1</sup>, Zoya Ignatova<sup>1,\*</sup>, Thomas E. Gorochoowski<sup>2,\*</sup>

<sup>1</sup> Institute of Biochemistry and Molecular Biology, University of Hamburg, Hamburg, Germany

<sup>2</sup> School of Biological Sciences, University of Bristol, Bristol, United Kingdom

\* Correspondence should be addressed to T.E.G. ([thomas.gorochoowski@bristol.ac.uk](mailto:thomas.gorochoowski@bristol.ac.uk)) and Z.I. ([zoya.ignatova@uni-hamburg.de](mailto:zoya.ignatova@uni-hamburg.de))

**Keywords:** proteolysis, protein degradation, genetic circuit, resource recycling, burden

1    **Abstract**

2    The use of short peptide tags in synthetic genetic circuits allows for the tuning of gene  
3    expression dynamics and the freeing of amino acid resources through targeted protein  
4    degradation. Here, we use elements of the *Escherichia coli* and *Mesoplasma florum* transfer-  
5    messenger RNA (tmRNA) ribosome rescue systems to compare endogenous and foreign  
6    proteolysis systems in *E. coli*. We characterize the performance and burden of each and show  
7    that while both greatly shorten the half-life of a tagged protein, the endogenous system is  
8    approximately seven times more efficient. Based on these results, we then show how  
9    proteolysis can be used to improve cellular robustness through targeted degradation of a  
10   reporter protein in auxotrophic strains, providing a limited secondary source of essential amino  
11   acids that help partially restore growth when nutrients become scarce. These findings provide  
12   avenues for controlling the functional lifetime of engineered cells once deployed and  
13   increasing their tolerance to fluctuations in nutrient availability.

## 14 Introduction

15 Prokaryotic protein degradation is an essential quality control mechanism in cells and plays a  
16 crucial role in eliminating damaged and/or non-functional proteins<sup>1-3</sup>. It is enabled by a  
17 network of ATP-dependent proteases and adaptors that recognize specific motifs in misfolded  
18 proteins, or degrons<sup>4,5</sup>. Protein degradation in bacteria is mediated by the prokaryotic transfer-  
19 messenger RNA (tmRNA) ribosome rescue system, whereby an SsrA peptide tag is added C-  
20 terminally to nascent polypeptides, targeting them for degradation by several endogenous  
21 proteases<sup>6</sup>. These include ClpXP, ClpAP, FtsH and Lon, with ClpXP and ClpAP being the  
22 most active in *Escherichia coli*, degrading over 90% of SsrA-tagged proteins<sup>1,3,7</sup>. The tagging  
23 of proteins for degradation has gained interest in the field of synthetic biology, as it allows for  
24 specific and controllable protein degradation, which has been used to modulate protein  
25 turnover rates, investigate protein function by reducing intracellular concentrations, and as a  
26 means to tune dynamic processes, e.g., the period of genetic oscillators<sup>8-11</sup>.

27 The SsrA peptide-tag system is conserved across prokaryotic species, but the tags  
28 vary in their amino acid composition and length<sup>8,12-14</sup>. The *E. coli* SsrA tag is the most  
29 extensively characterized, and its last three amino acids, 'LAA', determine the tag strength  
30 and the rate of tagged protein degradation<sup>8</sup>. Variants of these critical residues such as 'LVA',  
31 'AAV' and 'ASV' result in different degradation rates, with 'LAA' and 'LVA' rendering tagged-  
32 GFP much more unstable than the 'AAV' or 'ASV' variants<sup>8</sup>. The growing knowledge of *E. coli*  
33 proteases and their dependency on auxiliary adaptor proteins has also allowed for controllable  
34 modulation of protein half-lives and degradation<sup>2,15,16</sup>. For example, the degradation of  
35 proteins tagged with an *E. coli* tag variant 'DAS' is mediated by the induction of the SspB  
36 adaptor protein in *Bacillus subtilis*<sup>14</sup>.

37 Using SsrA tags from distinct species offers another level of control over protein  
38 degradation. The simultaneous use of multiple tags in parallel supports the construction of  
39 more complex systems where degradation of multiple proteins can be independently  
40 controlled. Several SsrA tags from other species have been characterized<sup>13,14,17</sup>, including  
41 that of *Mesoplasma florum*<sup>12</sup>. This is targeted by the efficient *M. florum* Lon protease that acts  
42 orthogonally to the endogenous *E. coli* system, making it possible to use both simultaneously  
43 in *E. coli* cells<sup>12</sup>. Previous studies have identified regions of the *M. florum* tag which are crucial  
44 for recognition by *E. coli* and *M. florum* proteases, leading to the development of variants of  
45 the *M. florum* tag through deletion of non-essential regions or replacement of residues with  
46 other amino acids<sup>10,18</sup>. Furthermore, the specificity of the endogenous *M. florum* Lon protease  
47 to the cognate *M. florum* SsrA tag has enabled the development of inducible orthogonal protein  
48 degradation systems in *E. coli* with diverse applications, including controlling synthetic circuits  
49 such as toggle switches<sup>10-12,18</sup>.

50 Whilst targeted protein degradation has seen wide use in tuning the function of genetic  
51 circuits, much less attention has been placed on its use in a more native context. For example,  
52 using protein degradation to help recycle essential amino acid resources when nutrient stress  
53 occurs<sup>19,20</sup>. Although such capabilities are less important when cells are grown in the rich and  
54 carefully controlled conditions of the lab, when deploying an engineered system into more  
55 realistic real work environments like your gut or the soil, high variability in nutrient availability  
56 is inevitable<sup>21–23</sup>. Therefore, having systems to help buffer cells from these effects is an  
57 important area that warrants further research.

58 Here, we attempt to directly address this by exploring how endogenous and  
59 heterologous protein degradation systems can be used to manage reservoirs of amino acids  
60 that are locked up in stable proteins that can then be subsequently released when needed.  
61 We explore the suitability of endogenous and heterologous systems for implementing this type  
62 of system and show using auxotrophic strains how targeted release of amino acids from a  
63 reporter protein enables the partial recovery of growth when an essential amino acid becomes  
64 scarce. This proof-of-concept offers a starting point for developing new cellular chassis that  
65 are more robust to nutrient fluctuations, as well as opening avenues to constrain the functional  
66 “shelf-life” of a cell by providing an internal amino acid reservoir with a limited capacity.

67

## 68 **Results**

### 69 ***Assessing the proteolytic activities of E. coli and M. florum SsrA tags***

70 To build our system, we began by comparing the activities of the *E. coli* and *M. florum*  
71 proteolysis systems by assembling genetic constructs where an *eGFP* (GFP) reporter gene  
72 was tagged with one of our two proteolysis tags. Specifically, we used the *E. coli* (Ec;  
73 AANDENYALAA) and *M. florum* (Mf; AANKNEENTNEVPTFMLNAGQANYAFA) SsrA tag  
74 sequences which were codon optimized for expression in *E. coli* (**Materials and Methods**)  
75 and fused to the C-terminus of *GFP* whose expression was under the control of an IPTG-  
76 inducible promoter ( $P_{lac}$ ). In this way, GFP was synthesized bearing one of two peptide tags,  
77 targeting it for proteolytic degradation by each of our chosen systems (**Figure 1A**). Because  
78 the Mf tag is specifically recognized by its cognate Lon protease from *M. florum* (Mf-Lon) which  
79 is not present in *E. coli*<sup>12</sup>, we also constructed a separate plasmid where a codon-optimized  
80 *lon* gene from *M. florum*<sup>12</sup> was expressed under the control of an arabinose-inducible  
81 promoter ( $P_{BAD}$ ).

82 To assess the performance of the two tags, we expressed untagged GFP, GFP-Ec, or  
83 GFP-Mf alone and simultaneously with Mf-Lon in *E. coli* BL21(DE3) cells. We observed almost  
84 no fluorescence in cells expressing GFP-Ec compared to cells expressing untagged GFP  
85 (2.8% at 6 h), indicating that the *E. coli* tag was effective in targeting the tagged protein for

86 degradation by endogenous proteases. By contrast GFP-Mf, when expressed alone, saw  
87 reduced, though nevertheless substantial levels of GFP, suggesting that most, but not all, of  
88 this protein escaped the endogenous *E. coli* proteases (**Figure 1B**). As expected, further  
89 induction of Mf-Lon protease caused a 76% drop in GFP-Mf fluorescence, supporting the  
90 notion that the Mf tag is specifically recognized (**Figure 1B**). The fluorescence observed from  
91 cells expressing the untagged GFP remained largely the same upon induction of the Mf-Lon  
92 protease, further indicating the specificity of the protease for the Mf tag (**Figure S1**). It should  
93 be noted, that the fluorescence of cells expressing only GFP-Mf was lower than that of cells  
94 expressing untagged GFP. To assess whether this resulted from off-target degradation by  
95 endogenous proteases, or low levels of leaky Mf-Lon expression, we compared the  
96 fluorescence levels of cells co-transformed with GFP-Mf and Mf-Lon and cells transformed  
97 with only GFP-Mf (**Figure S2**). The expression levels of GFP-Mf when expressed alone in  
98 both cases were comparable, corroborating previous findings that off-target degradation by *E.*  
99 *coli* proteases does occur for the Mf-tag sequence, most likely due to residues homologous to  
100 the *E. coli* tag<sup>10,18</sup>.

101 To further compare the efficiency of the Ec and Mf tags, we induced the expression of  
102 untagged GFP, GFP-Mf, or GFP-Ec and after 5 hours removed the inducer, having allowed  
103 the GFP to reach high levels within the cells and surpass its maturation time<sup>24</sup>. Consequently,  
104 we monitored the degradation rate of each GFP variant and calculated their half-lives (**Figure**  
105 **1D; Materials and Methods**). The fluorescence levels of cells containing GFP-Ec remained  
106 very low throughout, indicating that even strong expression rates could not overcome the  
107 endogenous protein degradation. The half-lives of untagged GFP, GFP-Ec and GFP-Mf were  
108 calculated from this data to be 718 min, 18 min and 129 min, respectively. These numbers  
109 support the high efficiency of the endogenous *E. coli* proteases (almost seven times faster  
110 than when using the *M. florum* system). However, the Mf-tag also caused a large increase in  
111 the turnover rate, exhibiting a half-life less than a fifth of the untagged GFP.

112

### 113 ***Dynamic and targeted control of protein degradation using the M. florum SsrA system***

114 A potential advantage of using the *M. florum* SsrA tag system in *E. coli* for the recycling of  
115 amino acids is the ability to dynamically control its expression to coincide with an increased  
116 demand by the cell (e.g., during starvation conditions). This reduces the strength at which  
117 tagged proteins acting as a reservoir of amino acids need to be expressed as their turn-over  
118 rate can be kept low ensuring long-term stability. Such a method is not possible with the  
119 endogenous system as it is continually active. Therefore, stronger and continual expression  
120 of the tagged protein is necessary to maintain a similar sized pool.

121 To test whether induced expression of Mf-Lon would cause the rapid degradation of  
122 tagged proteins, we performed several time-course experiments where GFP-Mf expression

123 was induced at  $t = 0$  and Mf-Lon was either not present, simultaneously induced with GFP-Mf,  
124 or induced 1 or 2 hours after GFP-Mf induction (**Figure 2**). We found that only simultaneously  
125 inducing Mf-Lon with GFP-Mf resulted in strong degradation of GFP-Mf, with a 32 % drop in  
126 fluorescence after 6 hours. This compared to drops of 4% and 3% when Mf-Lon was induced  
127 1 and 2 hours after GFP-Mf, respectively.

128 This result was unexpected given that Mf-Lon has been shown to function efficiently in  
129 *E. coli*<sup>10,18</sup>, but could have been due to the varying expression strengths of the GFP-Mf reporter  
130 and Mf-Lon protease, which reside on different plasmids and are driven by different promoters  
131 (**Figure 1**). To test if this might be the case, we carried out additional experiments where Mf-  
132 Lon expression was induced 2 hours before induction of GFP-Mf (**Figure 2**). This would  
133 provide sufficient time for Mf-Lon to reach a high concentration before expression of the  
134 reporter and allow us to assess the maximal degradation rate that could be achieved by our  
135 system. We found that the initial increase in fluorescence when Mf-Lon was induced  
136 simultaneously with GFP-Mf, was negated when Mf-Lon was induced 2 hours prior,  
137 suggesting that expression and maturation of Mf-Lon occurs quickly, and a higher level of GFP  
138 degradation could occur. Nevertheless, the rate of fluorescence increase from 3 h after GFP-  
139 Mf induction was almost identical (**Figure 2B**), indicating that the concentration of Mf-Lon  
140 achieved when expressed from a  $P_{BAD}$  promoter and low-copy plasmid (p15A origin; ~10  
141 copies per cell) is unable to significantly impact the amount of GFP-Mf in the longer term,  
142 making this system unsuitable for rapid dynamic and inducible control of GFP degradation  
143 and recycling.

144

### 145 **Recovering cell growth by controlled amino acid recycling**

146 A major challenge when developing genetic circuits is managing the burden they place on  
147 shared cellular resources<sup>25,26</sup>. The expression of a genetic construct will sequester key cellular  
148 machinery like ribosomes and may exhaust amino acid supplies, which in turn can impact  
149 overall the cell physiology<sup>27,28</sup>, alter translation dynamics<sup>26</sup> and/or trigger stress  
150 responses<sup>29,30</sup>. A reason for this large impact is that often circuit components are strongly  
151 expressed and highly stable, locking away a large portion of the cell's resources from  
152 endogenous processes. It has also been observed that supplementing cells expressing  
153 recombinant proteins with amino acids, enhanced cell growth and protein production<sup>30</sup>.  
154 Consequently, we hypothesized that by increasing amino acid turnover of heterologous  
155 protein products through targeted proteolysis, less stress would be imparted on the cell under  
156 these conditions.

157 To test this hypothesis, we measured the growth rate of cells expressing tagged and  
158 untagged GFP under the control of the same strong  $P_{lac}$  promoter (**Figure 1A**). We reasoned  
159 that the expression of the tagged GFP would place less of a burden on the host compared to

160 non-tagged version, due to increased recycling of amino acids<sup>25,30,31</sup>. We found that compared  
161 to untransformed cells, the expression of any GFP protein, both tagged and untagged,  
162 reduced the cell growth rate (**Figure 3**). However, the reduction in growth rate (within the first  
163 three hours of induction), was smaller for cells expressing GFP-Ec (41%), or GFP-Mf and Mf-  
164 Lon (37%) compared to cells expressing untagged GFP (51%). This suggests that while the  
165 overall expression of a recombinant protein will always cause a burden on the cell, this burden  
166 is partially alleviated by more effective recycling of amino acids so that they are more readily  
167 available for endogenous processes.

168 Next, we asked whether the potential benefit of using tagged proteins might be  
169 amplified when the host cell experienced nutrient related stress. It is known that protein  
170 degradation is elevated under various stresses, possibly as a way to increase the availability  
171 of amino acids for synthesis of stress-related proteins<sup>19,32</sup>. Furthermore, as part of the *E. coli*  
172 stringent response to nutrient limitations, there is an increase in the level of amino acid  
173 biosynthesis enzymes, to meet the demand for amino acids<sup>33</sup>. Therefore, we reasoned that  
174 increased recycling of a heterologous pool of proteins could benefit a host cell where nutrients  
175 to synthesize amino acids had become scarce in the environment.

176 To explore this idea, we developed a simple mathematical model to capture the key  
177 flows of a hypothetical essential resource in the cell (e.g. an amino acid) and its impact on cell  
178 growth (**Figure 4A**). The model consisted of three ordinary differential equations that track the  
179 concentrations of the shared resource that is either available for use within the cell ( $N_c$ ), is  
180 actively in use by endogenous proteins ( $P_e$ ), or is locked up in foreign heterologous proteins  
181 ( $P_f$ ):

$$182 \quad \frac{dN_c}{dt} = r_i N_e + r_r P_f - N_c (r_f + r_e + \mu), \quad (1)$$

$$183 \quad \frac{dP_e}{dt} = r_e N_c - P_e \mu, \quad (2)$$

$$184 \quad \frac{dP_f}{dt} = r_f N_c - r_r \mu. \quad (3)$$

185 Here,  $N_e$  is the external resource concentration outside the cell with a cellular import rate of  $r_i$ ,  
186  $r_e$  and  $r_f$  are the rates that available resources within the cell are converted into endogenous  
187 or heterologous proteins, respectively, and  $r_r$  is the recycling rate of the heterologous proteins  
188 (e.g., due to targeted proteolysis). Cellular growth and the associated dilution (by cell division)  
189 of all resource pools was captured by  $\mu = 0.1 P_e$ . Parameters were chosen such that overall  
190 growth rate of the cell was consistent with *E. coli* data (i.e., having a division time ~25 min)  
191 and that relative internal transport, production and degradation rates were biologically realistic  
192 (**Materials and Methods**).

193 Using this model, we simulated cells expressing tagged and untagged proteins (**Figure**  
194 **4B**), and cells exposed to several external environmental shifts to limit the resources available



195 **(Figure 4C)**. In the first shift, we removed all resources from the environment at 500 min, and  
196 in the second, at the same time point, we applied an oscillating external nutrient concentration  
197 (for more details see **Materials and Methods**). In both cases, we compared cells not  
198 producing any heterologous protein (i.e.,  $r_f = 0$ ) to those producing a recombinant protein that  
199 is subsequently recycled for reuse by the cell. We then measured their response in terms of  
200 growth rate normalized to when the external nutrient was continually present (i.e., the steady  
201 state growth rate when  $N_e = 1$ ). In both cases, the model showed a reduction in the relative  
202 impact to changes in environmental availability (**Figure 4C**), demonstrating the ability for a  
203 recycled internal reservoir of a heterologous resource to act as a backup source that can help  
204 buffer the cell temporarily from environmental change. It should be noted that inclusion of a  
205 heterologous resource pool and its recycling does have an impact on cellular growth rate.  
206 However, for some applications (e.g., excitable systems that are sensitive to even minor  
207 fluctuations in cellular behaviors), it may be preferable to have a more consistent performance  
208 when faced with environmental variability.

209 To test the model predictions, we used auxotrophic *E. coli* strains RF10<sup>34</sup> ( $\Delta lysA$ ) and  
210 ML17<sup>35</sup> ( $\Delta glnA$ ), which are unable to synthesize lysine and glutamine, respectively. This  
211 allowed us to tightly control endogenous amino acid levels by modulating the external supply  
212 in the media. Furthermore, lysine and glutamine are amongst the most abundant amino acids  
213 in our GPF reporter (8.4% and 6.7% of the total amino acid composition, respectively) offering  
214 suitable reservoirs of these key resources. We grew each of the strains expressing untagged  
215 GFP and GFP-Ec in nutrient-rich media to allow for a buildup of the recombinant protein.  
216 Following this, cells were switched to minimal medium, effectively removing the source of all  
217 external amino acids, and for our auxotrophic strains, completely removing access to lysine  
218 and glutamine, respectively. Agreeing with model predictions, we found that both strains  
219 expressing GFP-Ec exhibited a higher growth rate than cells expressing untagged GFP; 0.068  
220 and 0.044 h<sup>-1</sup> for GFP-Ec versus 0.044 and 0.022 h<sup>-1</sup> for GFP-nt for the  $\Delta lysA$  and  $\Delta glnA$   
221 strains, respectively (**Figure 5A-B**). We suspect the higher growth rates are attributed to the  
222 degradation of GFP-Ec, indicated by the lower fluorescence yields (**Figure 5C**). Addition of  
223 lysine or glutamine (7 mM) to the medium for the respective auxotrophic strains saw a marked  
224 increase in cell growth rate from 0.068 to 0.096 h<sup>-1</sup> for the  $\Delta lysA$  strain with lysine present, and  
225 from 0.022 to 0.09 h<sup>-1</sup> for the  $\Delta glnA$  strain with glutamine present when expressing untagged  
226 GFP (**Figure 5B**). This indicates that indeed glutamine and lysine were the major limiting  
227 factors for cell growth and that recycling of the internal heterologous protein reservoir was able  
228 to partially buffer this impact (25% and 24% recovery for  $\Delta lysA$  and  $\Delta glnA$ , respectively).

229 We observed an increased growth rate of 35% and 50%, for the  $\Delta lysA$  and  $\Delta glnA$   
230 strains respectively, between cells expressing untagged GFP and those expressing GFP-Ec.  
231 The greater increase in growth rate for the  $\Delta glnA$  strain, despite it being less abundant in GFP,



232 indicates that in this case the abundance levels of lysine and glutamine in GFP did not  
233 influence the increase in growth rate when cells were forced to use their internal amino acid  
234 supplies. Interestingly, we saw the  $\Delta glnA$  strain grew slower in general than the  $\Delta lysA$  strain  
235 (**Figure 5B**), which could be attributed to the fact that glutamine is more common in the *E. coli*  
236 proteome than lysine<sup>36</sup>. Therefore, a lack of endogenous glutamine would have a greater  
237 effect on cellular growth when external nutrients were limited, than a lack of endogenous  
238 lysine.

239 Together, these results show how targeted degradation of heterologous proteins can  
240 be beneficial to cells experiencing severe amino acid shortage and be used to buffer  
241 fluctuations in intracellular levels of amino acids and facilitating growth under amino acid  
242 limitations.

243

## 244 Discussion

245 In this work, we have characterized the performance of the endogenous *E. coli* proteolysis  
246 system and a similar heterologous system from *M. florum* within *E. coli* cells (**Figure 1**)<sup>8,12</sup>.  
247 When targeting identically expressed fluorescent reporter proteins, we found both systems  
248 were able to increase degradation rate. However, the endogenous system was approximately  
249 seven times more effective than the *M. florum* system, shortening the half-life of untagged  
250 GFP almost 40-fold. We also observed some crosstalk between these systems, with the  
251 reporter protein containing the *M. florum* tag also seeing increased degradation compared to  
252 an untagged reporter when the cognate Mf-Lon protease was not present. While  
253 characterization of these systems has been performed independently<sup>8,10,11,18,37</sup>, we believe  
254 this study to be the first that directly compares these systems working on an identical target  
255 protein in the same host context.

256 In addition, we explored the option to switch on targeted degradation by inducing  
257 expression of the *M. florum* system dynamically over time. Unfortunately, we found that  
258 expression of the Mf-Lon protease in our system was unable to strongly degrade the targeted  
259 reporter, unless it was induced before the reporter was expressed. This was likely due to the  
260 expression rate of Mf-Lon being lower than for the reporter, due to the use of different plasmid  
261 backbones with different plasmid copy numbers, and thus the protease being unable to fully  
262 degrade the additional reporter being produced (**Figure 2**).

263 We also studied the effect of proteolysis tags in genetic circuits on the host cell, by  
264 assessing cell growth (**Figure 3**). As was previously observed, we found that a metabolic  
265 burden is placed on cells expressing recombinant proteins, whether tagged or untagged,  
266 indicated by a reduction in growth rate. Interestingly though, this effect was smaller in cells  
267 expressing tagged GFP than in cells expressing the untagged variant, providing evidence for

268 the benefits of using proteolysis tags when expressing recombinant proteins. This beneficial  
269 effect is likely due to increased amino acid recycling, freeing up these resources for use by  
270 endogenous processes connected to growth. Based on these findings, we developed a model  
271 that further illustrated these benefits, specifically under nutrient stress, where we reasoned  
272 that the benefits would be further increased due to external amino acid shortages. (**Figure 4**).  
273 Finally, by using auxotrophic strains, we were able to show that recycled heterologous proteins  
274 could act as a limited reservoir of amino acid resources, helping buffer the cell from  
275 fluctuations in nutrient availability and partially recover cell growth (**Figure 5**).

276 As our ambitions in synthetic biology grow and we begin to consider the construction  
277 of entire cellular systems, understanding how resources flow and are recycled in these  
278 systems will become crucial. Demonstrating the novel benefit of proteolysis tags as an amino  
279 acid recycling mechanism leads the way for further being able to control these nutrient fluxes  
280 within cells, and could aid in the construction of more complex synthetic systems, which  
281 include resource recycling. This work subsequently provides a perspective on the use of  
282 internal pools of heterologous proteins that can be released when needed to alleviate potential  
283 environmental nutrient fluctuations. Furthermore, this approach can be used to help buffer the  
284 cell and our engineered genetic systems from unavoidable variability that is present within  
285 real-world environments and paves the way for creating more reliable and robust host cell  
286 biosystems.

287

## 288 **Materials and Methods**

### 289 ***Bacterial strains, media, and cloning***

290 The *E. coli* strain DH5 $\alpha$  ( $\phi$ 80*dlacZ*  $\Delta$ M15  $\Delta$ (*lacZYA-argF*)U169 *deoR recA1 endA1 hsdR17rK-*  
291 *mK+ phoA supE44  $\lambda$ - thi-1*) was used for plasmid construction and cloning, and the strain  
292 BL21(DE3) (*F – ompT hsdSB (rB– mB–) gal dcm (DE3)*) used for characterisation of our  
293 genetic systems. Cells were grown in Luria-Bertani (LB) media (Roth, #X968.4), or minimal  
294 media (12.8 g/l Na<sub>2</sub>HPO<sub>4</sub>·7H<sub>2</sub>O, 3 g/l KH<sub>2</sub>PO<sub>4</sub>, 1 g/l NH<sub>4</sub>Cl, 2mM MgSO<sub>4</sub>, 0.1 mM CaCl<sub>2</sub>, 0.4%  
295 glucose). 100 mg/ml ampicillin (Sigma Aldrich, #A9393), 50 mg/ml kanamycin (Sigma Aldrich  
296 #K1377), or 34 mg/ml chloramphenicol (Sigma Aldrich, #C0378) were used as selection  
297 markers for cloned plasmids. Enhanced green fluorescent protein (eGFP) in the pET16b  
298 vector under the IPTG-inducible *Lac* promoter system was C-terminally tagged with the *E. coli*  
299 (*Ec*) tag through site directed mutagenesis: overlap PCR primers were designed which  
300 contained the *Ec* tag sequence. These were phosphorylated and used for PCR with the  
301 plasmid backbone. The product was digested with *DpnI* (NEB, #R0176S) overnight, and the  
302 resulting product PCR purified. A ligation was carried out to circularise the vector, using 10-  
303 50 ng of DNA and T4 DNA ligase (Thermo fisher, #EL0011), according to the manufacturer's

304 instructions. The resulting plasmid was transformed into competent DH5 $\alpha$  cells. The *M. florum*  
305 tag was codon optimized for expression in *E. coli* by selecting the most highly abundant  
306 codons in *E. coli* for the corresponding amino acids (codon sequence: GCT GCA AAC AAG  
307 AAC GAG GAA AAC ACC AAC GAA GTA CCG ACC TTC ATG CTG AAC GCA GGC CAG  
308 GCT AAC TAT GCA TTC GCA), and GFP was C-terminally tagged with the Mf tag using a  
309 digest-and-ligate approach: oligonucleotides were designed to contain the Mf tag sequence,  
310 and annealed to create double-stranded DNA fragments, then phosphorylated. The pET16b-  
311 eGFP vector was digested with fast digest *BsrGI* and *XhoI* (NEB, #R0102S and #R0146S) and  
312 used in a ligation reaction with the inserts (3:1 ratio) using T4 DNA ligase (Thermo Fisher,  
313 #EL0011), at 22 °C for 4-6 h. Competent DH5 $\alpha$  cells were transformed with the resulting  
314 product. The *M. florum* Lon protease from the pBAD33 vector (a gift from Robert Sauer;  
315 Addgene plasmid #21867) was subcloned into the *pSB3C5* plasmid under the *araBAD*  
316 promoter using Golden Gate assembly. The primers for the PCR reaction were designed to  
317 flank the *Mf-Lon* with *BsmBI* restriction sites and include them into the vector (*pSB3C5*). The  
318 Golden Gate assembly reaction was set up, which included insert:vector in a 4:1 ratio, *BsmBI*  
319 (NEB, # R0739S), and 1 $\mu$ l T4 DNA Ligase (Thermo Fisher, #EL0011). The following conditions  
320 were used for the reaction: 60 cycles of 42°C for 3 min then 16°C for 4 min, followed by 50°C  
321 for 5 min and 80°C for 5 min. The resulting product was transformed into *E. coli* DH5 $\alpha$  cells.

322

### 323 ***Proteolysis tag activity assays***

324 Overnight cultures of BL21(DE3) cells transformed with pET16b-eGFP-no tag, pET16b-eGFP-  
325 Ec, or pET16b-eGFP-Mf and pSB3C5-mfLon were grown for 12-16 h at 37°C 250rpm, then  
326 re-suspended in minimal media with appropriate antibiotics for selection. The cultures were  
327 grown to an OD<sub>600</sub> of 0.4–0.6, then induced with 0.5 mM IPTG (Roth, #2316.3) or 0.2% (w/v)  
328 arabinose (Roth, #5118.2). 1% glucose was added to the cultures expressing untagged  
329 proteins, to prevent basal expression from the pET16b vector<sup>39</sup>. For degradation assays, cells  
330 were pelleted 5 h after induction, washed twice in 1X phosphate-buffered saline (PBS) (137  
331 mM NaCl, 2.7 mM KCl, 10mM Na<sub>2</sub>HPO<sub>4</sub>, 1.8 mM KH<sub>2</sub>PO<sub>4</sub>) then re-suspended in minimal  
332 medium containing the relevant antibiotics, without IPTG. In cultures co-transformed with two  
333 plasmids, IPTG induction was stopped, but the second inducer, 0.2% (w/v) arabinose, was  
334 added to the medium to induce expression of Mf-Lon. 200  $\mu$ l of the cultures were grown in a  
335 96-well flat-bottom black plate with clear bottom (Corning, Sigma Aldrich #CLS3603-48EA) at  
336 37°C with orbital shaking in a multimode microplate reader (Tecan Spark). Optical density (at  
337 600 nm) and fluorescence measurements (excitation and emission wavelengths of 472 nm  
338 and 517 nm, respectively, with a gain of 50) were recorded at discrete intervals. Fluorescence  
339 was normalised to the OD<sub>600</sub> value (a.f.u./OD<sub>600</sub>). Untransformed BL21(DE3) cells were used  
340 as a negative control and their normalised autofluorescence values (a.f.u./OD<sub>600</sub>) were

341 subtracted from the normalised fluorescence values (a.f.u./OD<sub>600</sub>) of the cells in different  
342 conditions.

343

### 344 ***Auxotrophic strain and starvation assays***

345 The RF10 ( $\Delta lysA$ ) and ML17 strains ( $\Delta glnA$ ) (a gift from Robert Gennis & Toshio Iwasaki  
346 Addgene plasmids #62076 and #61912) were transformed with the plasmids developed in this  
347 work and grown in LB to an OD<sub>600</sub> of ~0.3. GFP expression was then induced with 0.5 mM  
348 IPTG for 1 h. After this, cells were pelleted, washed in 1X PBS, and re-suspended in minimal  
349 medium containing appropriate antibiotics for plasmid selection with additional 0.5 mM IPTG  
350 to maintain GFP expression. Additionally, 7 mM of lysine (Sigma Aldrich, #L5501) or glutamine  
351 (Serva, #22942) was added to positive control samples. The OD<sub>600</sub> value and fluorescence  
352 were then measured as described above using a microplate reader every 10 min over 12 h.

353

### 354 ***Data analysis***

355 Python version 3.9.5 and packages matplotlib version 3.3.2, NumPy version 1.19.2, and SciPy  
356 version 0.13 were used to fit the degradation data to a first order decay function of the form,  
357  $N(t) = 100e^{-\lambda t}$ , where  $N(t)$  is the percentage of remaining fluorescence at time  $t$  post the halt  
358 of GFP production, and  $\lambda$  the decay constant. The half-life of GFP was then given by  $t_{1/2} =$   
359  $\ln(2)/\lambda$ . When investigating the dynamics of the Mf-tag system, the rate of GFP production ( $F$ )  
360 was calculated as the gradient of fluorescence values normalized to OD<sub>600</sub> between 3 and 7  
361 h after induction (**Figure 2A**). To obtain values for the growth rate of cells expressing tagged  
362 or untagged GFP, the slope of a linear fit to the growth curve (OD<sub>600</sub> measurements) was  
363 calculated between 1 - 4 h (**Figure 3**). The growth rate of auxotrophic strains was calculated  
364 in the same way, between 5 and 12 h (**Figure 5B**). To compare whether the growth rates of  
365 the auxotrophic strains were statistically significantly different, a 2-sample t test was used.  
366  $P < 0.05$  was considered as statistically significant. The statistical analysis was performed, and  
367 all plots and slopes of best fit were generated, using OriginLab Pro software (2019 version 64  
368 bit).

369

### 370 ***Model parameterization and simulation***

371 Parameters for the model of resource allocation and use were selected based on the  
372 assumption that an external resource concentration of  $N_e = 1$  would lead to a realistic cell  
373 doubling time (~25 min) and that internal cellular rates would have biologically feasible relative  
374 values. This resulted in simulations with foreign protein recycling present being simulated with  
375 parameters:  $r_i = 0.015$ ,  $r_e = 0.02$ ,  $r_f = 0.2$ ,  $r_r = 0.01$ , and with  $\mu = 0.1 \times P_e$ . In all simulations,  
376 initial conditions for all states were set to 0, and the dynamics simulated for 500 min with  $N_e =$   
377 1.0 for the system to reach a steady state before any environmental fluctuations occurred. The

378 model was simulated using Python version 3.9 and the SciPy version 0.13. The code for all  
379 simulations is available as **Supplementary Data 1**.

380

### 381 **Supporting Information**

382 The specificity of the Lon protease for the Mf tag (**Figure S1**); Off-target degradation by *E. coli*  
383 proteases on the Mf tag (**Figure S2**). The effects of Ec and Mf proteolysis tags on cell  
384 fluorescence and growth (**Figure S3**)

385

### 386 **Acknowledgements**

387 We thank Irem Avcilar-Kucukgoze for creating the original GFP-expressing plasmid, Robert  
388 Sauer for providing us with the pBAD33-mf-lon plasmid, and Robert Gennis and Toshio  
389 Iwasaki for providing us with the ML17 and RF10 *E. coli* strains. This work was supported by  
390 European Union's Horizon 2020 research and innovation program as part of the SynCrop ETN  
391 under the Marie Skłodowska-Curie grant 764591 (Z.I.), BrisSynBio, a BBSRC/EPSRC  
392 Synthetic Biology Research Centre grant BB/L01386X/1 (T.E.G.) and a Royal Society  
393 University Research Fellowship grant UF160357 (T.E.G.)

394

### 395 **Author contributions**

396 Z.I. and T.E.G. conceived the study. K.S. performed experiments and analyses. T.E.G.  
397 developed the mathematical model. Z.I. and T.E.G. supervised the work and discussed the  
398 data. All authors contributed to the writing of the manuscript.

399

### 400 **Conflict of interest statement**

401 None declared.

## 402 References

- 403 1. Keiler, K. C., Waller, P. R. H. & Sauer, R. T. (1996) Role of a peptide tagging system  
404 in degradation of proteins synthesized from damaged messenger RNA. *Science*.  
405 **271**(5251), 990–993
- 406 2. Farrell, C. M., Grossman, A. D. & Sauer, R. T. (2005) Cytoplasmic degradation of  
407 ssrA-tagged proteins. *Mol. Microbiol.* **57**(6), 1750–1761 3.
- 408 3. Maurizi, M. R. (1992) Production of abnormal proteins in *E. coli* stimulates  
409 transcription of lon and other heat shocks genes. *Trends biochem. Science.* **48**(10)
- 410 4. Gottesman, S. (2003) Proteolysis in Bacterial Regulatory Circuits. *Annual Review of*  
411 *Cell and Developmental Biology.* **19**, 565–587.
- 412 5. Chung, C. H. & Goldberg, A. L. (1981) The product of the lon (capR) gene in  
413 *Escherichia coli* is the ATP-dependent protease, protease La. *Proc. Natl. Acad. Sci.*  
414 *U. S. A.* **78**(81), 4931–4935
- 415 6. Moore, S. D. & Sauer, R. T. (2007) The tmRNA system for translational surveillance  
416 and ribosome rescue. *Annual Review of Biochemistry.* **76**, 101–124.
- 417 7. Gottesman, S., Roche, E., Zhou, Y. & Sauer, R. T. (1998) The ClpXP and ClpAP  
418 proteases degrade proteins with carboxy-terminal peptide tails added by the SsrA-  
419 tagging system. *Genes Dev.* **12**, 1338-1347
- 420 8. Andersen, J. B. *et al.* (1998) New Unstable Variants of Green Fluorescent Protein for  
421 Studies of Transient Gene Expression in Bacteria. *Applied and Environmental*  
422 *Microbiology.* **64**(6), 2240-2246
- 423 9. Stricker, J. *et al.* (2008) A fast, robust and tunable synthetic gene oscillator. *Nature*  
424 **456**(7221), 516–519
- 425 10. Cameron, D. E. & Collins, J. J. (2014) Tunable protein degradation in bacteria. *Nat.*  
426 *Biotechnol.* **32**(12), 1276–1281.
- 427 11. Chan, C. T. Y., Lee, J. W., Cameron, D. E., Bashor, C. J. & Collins, J. J. (2016)  
428 ‘Deadman’ and ‘Passcode’ microbial kill switches for bacterial containment. *Nature*  
429 *Chemical Biology.* **12**, 82–86
- 430 12. Gur, E. & Sauer, R. T. (2008) Evolution of the ssrA degradation tag in Mycoplasma:  
431 Specificity switch to a different protease. *Proc. Natl. Acad. Sci. U. S. A.* **105**(42),  
432 16113–16118.
- 433 13. Ge, Z. & Karzai, A. W. (2009) Co-evolution of multipartite interactions between an  
434 extended tmRNA tag and a robust Lon protease in Mycoplasma. *Mol. Microbiol.* **74**(5),  
435 1083–1099.
- 436 14. Griffith, K. L. & Grossman, A. D. (2008) Inducible protein degradation in *Bacillus*  
437 *subtilis* using heterologous peptide tags and adaptor proteins to target substrates to



- 438 the protease ClpXP. *Mol. Microbiol.* **70**(4), 1012–1025.
- 439 15. Kim, Y. I., Burton, R. E., Burton, B. M., Sauer, R. T. & Baker, T. A. (2000) Dynamics  
440 of substrate denaturation and translocation by the ClpXP degradation machine. *Mol.*  
441 *Cell* **5**(4), 639–648.
- 442 16. McGinness, K. E., Baker, T. A. & Sauer, R. T. (2006) Engineering Controllable Protein  
443 Degradation. *Mol. Cell* **22**(5), 701–707.
- 444 17. Ahlawat, S. & Morrison, D. A. (2009) ClpXP degrades SsrA-tagged proteins in  
445 streptococcus pneumoniae. *J. Bacteriol.* **191**(8), 2894–2898.
- 446 18. Lv, L., Wu, Y., Zhao, G. & Qi, H. (2019) Improvement in the Orthogonal Protein  
447 Degradation in Escherichia coli by Truncated mf-ssrA Tag. *Trans. Tianjin Univ.* **25**(4),  
448 357–363.
- 449 19. Jozefczuk, S. *et al.* (2010) Metabolomic and transcriptomic stress response of  
450 Escherichia coli. *Mol. Syst. Biol.* **6**(364), 1–16.
- 451 20. Mahmoud, S. A. & Chien, P. (2018) Regulated Proteolysis in Bacteria. *Annual Review*  
452 *of Biochemistry.* **87** 677–696.
- 453 21. Kotula, J. W. *et al.* (2014) Programmable bacteria detect and record an environmental  
454 signal in the mammalian gut. *Proc. Natl. Acad. Sci. U. S. A.* **111**(13), 4838–4843.
- 455 22. Saltepe, B., Kehribar, E. Ş., Su Yirmibeşoğlu, S. S. & Şafak Şeker, U. Ö. (2018)  
456 Cellular Biosensors with Engineered Genetic Circuits. *ACS Sensors* **3**(1), 13–26.
- 457 23. Corbisier, P. *et al.* (1999) Whole cell- and protein-based biosensors for the detection  
458 of bioavailable heavy metals in environmental samples. *Analytica Chimica Acta.*  
459 **387**(3) 235–244.
- 460 24. Macdonald, P. J., Chen, Y. & Mueller, J. D. (2012) Chromophore maturation and  
461 fluorescence fluctuation spectroscopy of fluorescent proteins in a cell-free expression  
462 system. *Anal Biochem* **421**(1), 291–298.
- 463 25. Glick, B. R. (1995) Metabolic load and heterologous gene expression. *Biotechnology*  
464 *Advances.* **13**(2), 247–261.
- 465 26. Goroehowski, T. E., Avcilar-Kucukgoze, I., Bovenberg, R. A. L., Roubos, J. A. &  
466 Ignatova, Z. (2016) A Minimal Model of Ribosome Allocation Dynamics Captures  
467 Trade-offs in Expression between Endogenous and Synthetic Genes. *ACS Synth.*  
468 *Biol.* **5**(7), 710–720.
- 469 27. Ceroni, F., Algar, R., Stan, G. B. & Ellis, T. (2015) Quantifying cellular capacity  
470 identifies gene expression designs with reduced burden. *Nat. Methods* **12**(5), 415–  
471 418.
- 472 28. Kurland, C. G. & Dong, H. (1996) Bacterial growth inhibition by overproduction of  
473 protein. *Molecular Microbiology.* **21**(1) 1–4.
- 474 29. Ceroni, F. *et al.* (2018) Burden-driven feedback control of gene expression. *Nat.*



- 475 *Methods* **15**(5), 387–393.
- 476 30. Kumar, J., Chauhan, A. S., Shah, R. L., Gupta, J. A. & Rathore, A. S. (2020) Amino  
477 acid supplementation for enhancing recombinant protein production in *E. coli*.  
478 *Biotechnology and Bioengineering*. **117**(8), 2420–2433
- 479 31. Muhamadali, H. *et al.* (2016) Molecular BioSystems Interfacing chemical biology with  
480 the-omic sciences and systems biology Metabolomic analysis of riboswitch containing  
481 *E. coli* recombinant expression system. *Mol. BioSyst* **12**, 350.
- 482 32. Sanchez-Vazquez, P., Dewey, C. N., Kitten, N., Ross, W. & Gourse, R. L. (2019)  
483 Genome-wide effects on *Escherichia coli* transcription from ppGpp binding to its two  
484 sites on RNA polymerase. *Proc. Natl. Acad. Sci. U. S. A.* **116**(17), 8310–8319.
- 485 33. Irving, S. E., Choudhury, N. R. & Corrigan, R. M. (2021) The stringent response and  
486 physiological roles of (pp)pGpp in bacteria. *Nature Reviews Microbiology*. **19**(4), 256–  
487 271.
- 488 34. Lin, M. T. *et al.* (2015) *Escherichia coli* Auxotroph Host Strains for Amino Acid-  
489 Selective Isotope Labeling of Recombinant Proteins. *Methods in Enzymology*. **565**,  
490 45–66.
- 491 35. Lin, M. T. *et al.* (2011) A rapid and robust method for selective isotope labeling of  
492 proteins. *Methods* **55**(4), 370–378.
- 493 36. Spahr, P. F. (1962) Amino acid composition of ribosomes from *Escherichia Coli*. *J.*  
494 *Mol. Biol.* **4**(5), 395–406.
- 495 37. Butzin, N. C. & Mather, W. H. (2018) Crosstalk between Diverse Synthetic Protein  
496 Degradation Tags in *Escherichia coli*. *ACS Synth. Biol.* **7**(1), 54–62.
- 497 38. Weiße, A. Y., Oyarzún, D. A., Danos, V. & Swain, P. S. (2015) Mechanistic links  
498 between cellular trade-offs, gene expression, and growth. *Proc. Natl. Acad. Sci. U. S.*  
499 *A.* **112**(9), 1038–1047.
- 500 39. Grossman, T. H., Kawasaki, E. S., Punreddy, S. R. & Osburne, M. S. (1998)  
501 Spontaneous cAMP-dependent derepression of gene expression in stationary phase  
502 plays a role in recombinant expression instability. *Gene* **209**(1-2), 95–103.
- 503

504 **Figures and captions**

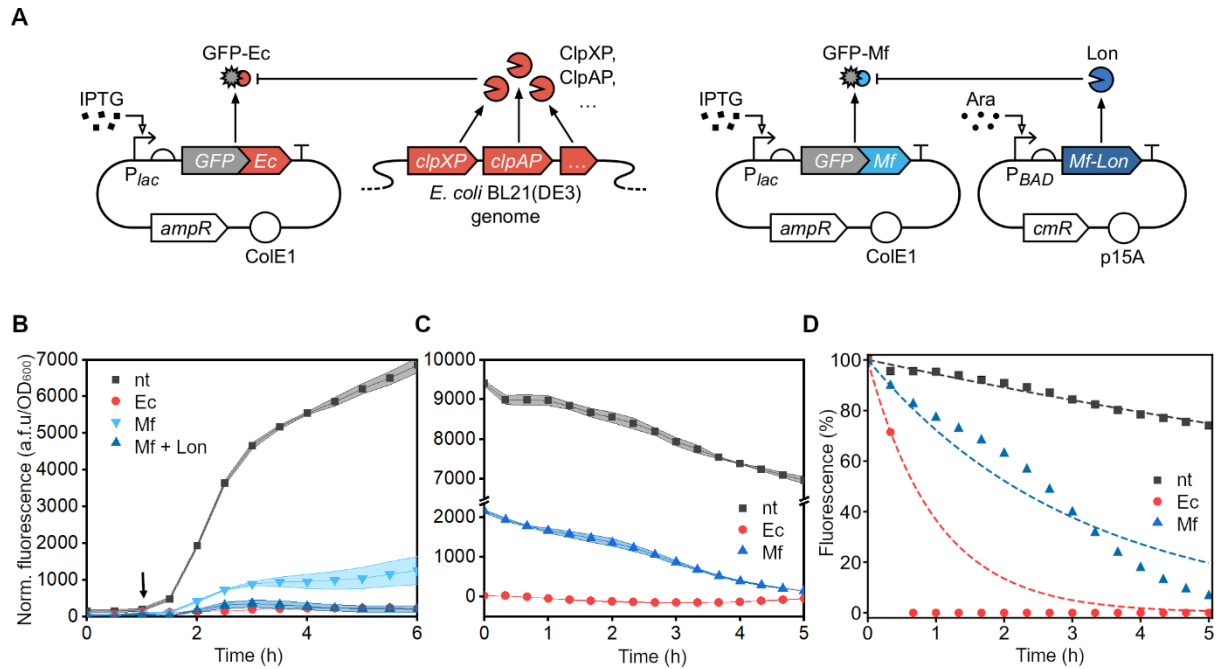

505

506 **Figure 1: *E. coli* and *M. florum* proteolysis systems used for targeted protein**  
 507 **degradation in *E. coli*.** (A) Schematic of the proteolysis systems. GFP is expressed with Ec  
 508 or Mf SsrA tags, which mark it for degradation by endogenous proteases, or the orthogonal  
 509 plasmid-borne Mf-Lon protease, respectively. (B) GFP fluorescence normalized to cell density  
 510 of *E. coli* BL21(DE3) cells expressing non-tagged GFP (nt), GFP-Ec (Ec) or GFP-Mf without  
 511 and with the co-expression of Mf-Lon (Mf and Mf + Lon, respectively). Arrow indicates  
 512 timepoint of GFP induction. (C) GFP fluorescence normalized to cell density of cells  
 513 expressing untagged GFP (nt), GFP-Ec (Ec), or GFP-Mf (Mf) after removal of inducer, whilst  
 514 maintaining Mf-Lon expression in the case of GFP-Mf. (D) % Fluorescence normalized to the  
 515 time of removal of the inducer of cells expressing untagged GFP (nt), GFP-Ec (Ec), or GFP-  
 516 Mf (Mf). Curves are fitted to first order exponential decay. Data are means  $\pm$  SD ( $n = 3$   
 517 independent biological replicates).

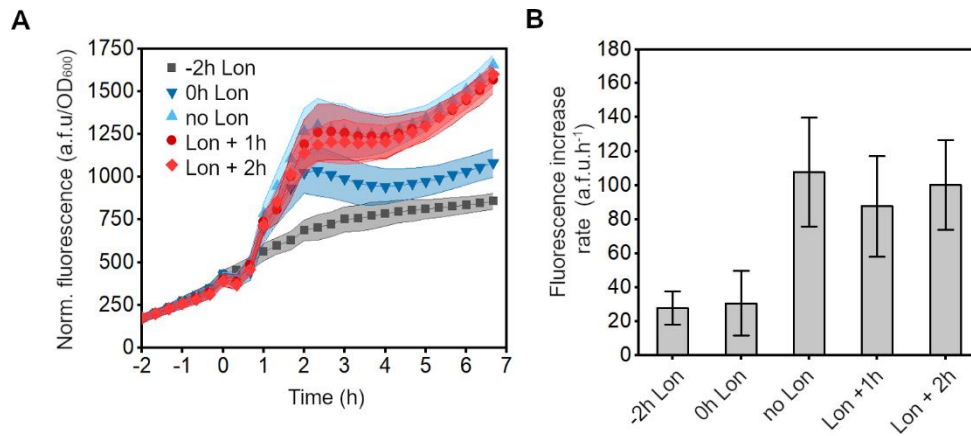

518

519 **Figure 2: The dynamics of the *M. florum* proteolysis system. (A)** GFP fluorescence  
520 normalized to cell density of cells expressing GFP-Mf without/with Mf-Lon induced at different  
521 time points. GFP-Mf expression was induced with 0.5mM IPTG at t = 0. Mf-Lon expression  
522 was induced 2 h before, simultaneously, or 1 or 2 h after GFP-Mf induction, with 0.2%(w/v)  
523 arabinose. Data are means  $\pm$  SD **(B)** Fluorescence increase rate of cells expressing GFP-Mf  
524 without/with Mf-Lon induced at different time points in relation to GFP-Mf induction. Data are  
525 means  $\pm$  SE ( $n = 5$  independent biological replicates).

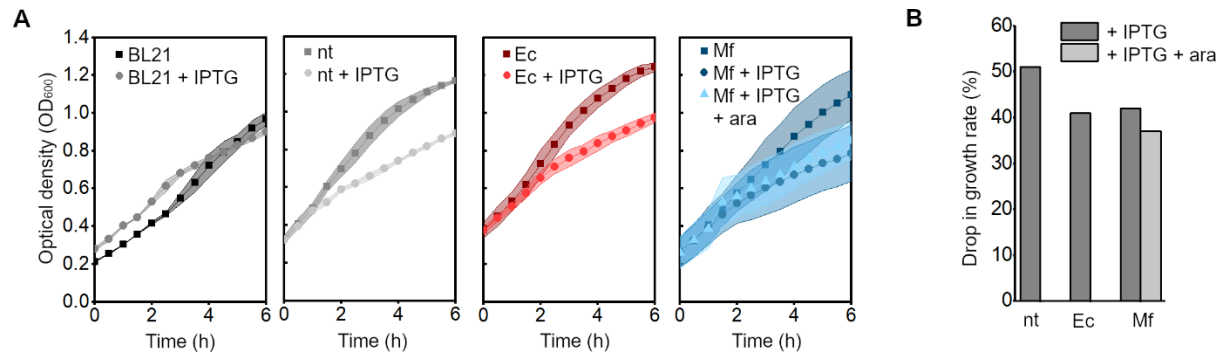

526

527

528

529

530

531

532

533

534

**Figure 3: Recombinant protein expression has a negative effect on cell growth. (A)** The effect of IPTG inducer (0.5mM) on the growth of untransformed BL21 cells, cells transformed with pet16b-GFP (nt), cells transformed with pet16b-GFP-Ec (Ec), or the combined effect of IPTG (0.5 mM) and arabinose (0.2 %(w/v)) on cells co-transformed with pet16b-GFP-Mf and pSB3C5-Mf-Lon. Cells were induced at 1 h. **(E)** Drop in growth rate (%), between 1 and 4 h, of cells induced to express either GFP-nt, GFP-Ec, GFP-Mf (+ IPTG) or GFP-Mf and Mf-Lon (+ IPTG + ara), compared to uninduced cells. Data are means  $\pm$  SD ( $n=3$  independent biological replicates).

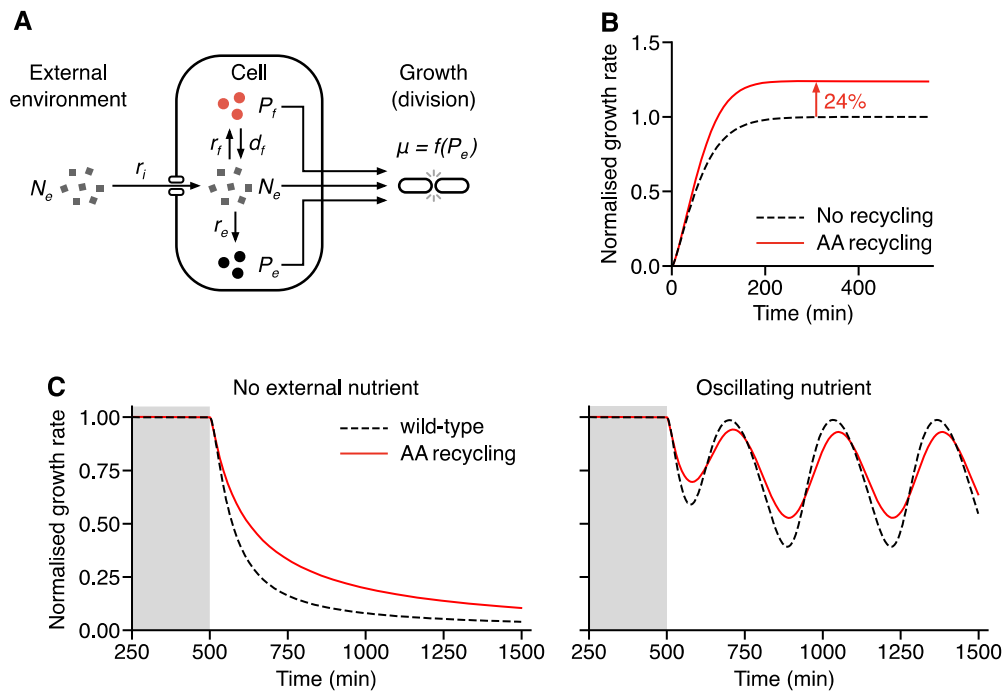

535

536 **Figure 4: Model capturing the benefits of amino acid recycling.** (A) Model overview.  $N_e$   
 537 denotes the external resource concentration,  $N_c$ ,  $P_e$  and  $P_f$  denote the concentration of a key  
 538 resource (ie. amino acid), available within the cell, locked up in endogenous or in heterologous  
 539 proteins, respectively.  $r_i$  denotes the cellular import rate of resources, which can be divided  
 540 into  $r_e$ , the rate at which resources are converted into endogenous proteins, and  $r_f$ , the rate at  
 541 which resources are converted into foreign recombinant proteins.  $\mu = f(P_e)$  captures cell growth  
 542 and dilution of resources by cell division. (B) Simulation of the normalized cell growth rate in  
 543 a strain expressing recombinant proteins, i.e. with no amino acid recycling, and in a strain  
 544 expressing tagged foreign proteins, i.e. with amino acid recycling. (C) Simulation of the effects  
 545 of nutrient stress on normalized cell growth rate expressing tagged proteins, i.e. with amino  
 546 acid recycling (AA recycling), and in a strain expressing no heterologous protein (wild type).  
 547 The external resource (nutrient) is continually present for the first 500 min, then either removed  
 548 completely, or oscillating nutrient levels are applied after this time. In all cases, growth rate is  
 549 normalized to the control growth with present external resource, i.e.  $N_e = 1$ .

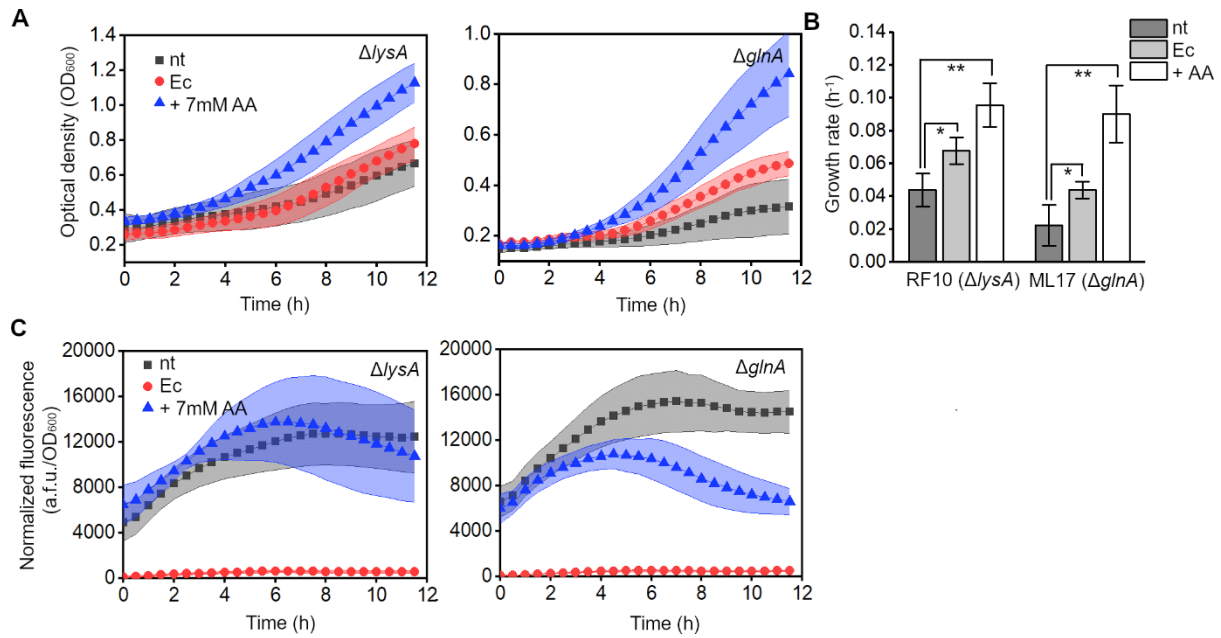

550

551 **Figure 5: Targeted GFP degradation provides amino acids to auxotrophic strains upon**  
552 **nutrient limitation. (A)** Growth of the RF10 ( $\Delta lysA$ ) and ML17 ( $\Delta glnA$ ) strains, expressing  
553 untagged GFP (nt) or GFP-Ec (Ec) with the addition of 7 mM lysine or glutamine supplement  
554 (+7mM AA). Data are means  $\pm$  SD (B) Quantification of the growth rates,  $\mu$ , of cells, between  
555 5–12 h of growth. (\*p < 0.05, \*\*p < 0.005, as compared to nt condition for each strain, with 2-  
556 sample t test). Data are means  $\pm$  SE (C) GFP fluorescence normalized to cell density of the  
557 RF10 ( $\Delta lysA$ ) and ML17 ( $\Delta glnA$ ) strains, expressing untagged GFP (nt) or GFP-Ec (Ec) with  
558 the addition of 7 mM lysine or glutamine supplement (+7mM AA). Data are means  $\pm$  SD (n =  
559 5 independent biological replicates).
