## Improving the robustness of engineered bacteria to nutrient stress using programmed proteolysis

Klara Szydło<sup>1</sup>, Zoya Ignatova<sup>1,\*</sup>, Thomas E. Gorochoowski<sup>2,\*</sup>

<sup>1</sup> Institute of Biochemistry and Molecular Biology, University of Hamburg, 20146, Hamburg, Germany

<sup>2</sup> School of Biological Sciences, University of Bristol, BS8 1TQ, Bristol, United Kingdom

\* Correspondence should be addressed to T.E.G. ([thomas.gorochoowski@bristol.ac.uk](mailto:thomas.gorochoowski@bristol.ac.uk)) and Z.I. ([zoya.ignatova@uni-hamburg.de](mailto:zoya.ignatova@uni-hamburg.de))

**Keywords:** proteolysis, protein degradation, genetic circuit, resource recycling, burden

1 **Abstract**

2 The use of short peptide tags in synthetic genetic circuits allows for the tuning of gene  
3 expression dynamics and release of amino acid resources through targeted protein  
4 degradation. Here, we use elements of the *Escherichia coli* and *Mesoplasma florum* transfer-  
5 messenger RNA (tmRNA) ribosome rescue systems to compare endogenous and foreign  
6 proteolysis systems in *E. coli*. We characterize the performance and burden of each and show  
7 that while both greatly shorten the half-life of a tagged protein, the endogenous system is  
8 approximately seven times more efficient. Based on these results, we then demonstrate using  
9 mathematical modelling and experiments how proteolysis can improve cellular robustness  
10 through targeted degradation of a reporter protein in auxotrophic strains, providing a limited  
11 secondary source of essential amino acids that help partially restore growth when nutrients  
12 become scarce. These findings provide avenues for controlling the functional lifetime of  
13 engineered cells once deployed and increasing their tolerance to fluctuations in nutrient  
14 availability.

## 15 Introduction

16 Prokaryotic protein degradation is an essential cellular quality control mechanism and plays a  
17 crucial role in eliminating damaged and/or non-functional proteins<sup>1-3</sup>. It is enabled by a  
18 network of ATP-dependent proteases and adaptors that recognize specific motifs in misfolded  
19 proteins, or degrons<sup>4,5</sup>. Protein degradation in bacteria is mediated by the prokaryotic transfer-  
20 messenger RNA (tmRNA) ribosome rescue system, where an SsrA peptide tag is added C-  
21 terminally to nascent polypeptides, targeting them for degradation by several endogenous  
22 proteases<sup>6</sup>. These include ClpXP, ClpAP, FtsH and Lon, with ClpXP and ClpAP being the  
23 most active in *Escherichia coli*, degrading over 90% of SsrA-tagged proteins<sup>1,3,7</sup>. The tagging  
24 of proteins for degradation has gained interest in the field of synthetic biology as it allows for  
25 specific and controllable protein degradation and has been used to modulate protein turnover  
26 rates, investigate protein function by reducing intracellular concentrations, and the tuning of  
27 dynamic processes (e.g., the period of genetic oscillators)<sup>8-11</sup>.

28 The SsrA peptide-tag system is conserved across prokaryotic species, but the tags  
29 vary in their amino acid composition and length<sup>8,12-14</sup>. The *E. coli* SsrA tag is the most  
30 extensively characterized, and its last three amino acids, 'LAA', determine the tag strength  
31 and the rate of tagged protein degradation<sup>8</sup>. Variants of these critical residues such as 'LVA',  
32 'AAV' and 'ASV' result in different degradation rates, with 'LAA' and 'LVA' rendering tagged-  
33 GFP more unstable than the 'AAV' or 'ASV' variants<sup>8</sup>. The growing knowledge of *E. coli*  
34 proteases and their dependency on auxiliary adaptor proteins has also allowed for controllable  
35 modulation of protein half-lives and degradation<sup>2,15,16</sup>. For example, the degradation of  
36 proteins tagged with an *E. coli* tag variant 'DAS' is mediated by the induction of the SspB  
37 adaptor protein in *Bacillus subtilis*<sup>14</sup>.

38 Using SsrA tags from distinct species offers another level of control over protein  
39 degradation. The simultaneous use of multiple tags in parallel supports the construction of  
40 more complex systems where degradation of multiple proteins can be independently  
41 controlled. Several SsrA tags from other species have been characterized<sup>13,14,17</sup>, including  
42 that of *Mesoplasma florum*<sup>12</sup>. This is targeted by the efficient *M. florum* Lon protease that acts  
43 orthogonally to the endogenous *E. coli* system, making it possible to use both simultaneously  
44 in *E. coli* cells<sup>12</sup>. Previous studies have identified regions of the *M. florum* tag which are crucial  
45 for recognition by *E. coli* and *M. florum* proteases, leading to the development of variants of  
46 the *M. florum* tag through deletion of non-essential regions or replacement of residues with  
47 other amino acids<sup>10,18</sup>. Furthermore, the specificity of the endogenous *M. florum* Lon protease  
48 to the cognate *M. florum* SsrA tag has enabled the development of inducible orthogonal protein  
49 degradation systems in *E. coli* with diverse applications, including the ability to control the  
50 behavior of synthetic circuits such as toggle switches<sup>10-12,18</sup>.

51           Whilst targeted protein degradation has seen widespread use in tuning the function of  
52 genetic parts and circuits, much less attention has been placed on its use in its more native  
53 context. Specifically, using protein degradation to help recycle essential amino acid resources  
54 when nutrient stress occurs<sup>19,20</sup>. Although such capabilities are less important when cells are  
55 grown in the rich and carefully controlled conditions of the lab, when deploying an engineered  
56 system into real work environments like your gut or the soil, high variability in nutrient  
57 availability is inevitable and cells must be able to react quickly<sup>21–24</sup>. Therefore, having  
58 programmable systems to help buffer cells from these effects is important and warrants further  
59 research.

60           Here, we attempt to address this need by exploring how endogenous and heterologous  
61 protein degradation systems can be used to manage reservoirs of amino acids that are locked  
62 up in stable non-endogenous proteins that can then be subsequently released when needed.  
63 We explore the suitability of endogenous and heterologous proteolysis systems for  
64 implementing this type of system and show using auxotrophic strains how targeted release of  
65 amino acids from a reporter protein enables the partial recovery of growth when an essential  
66 amino acid becomes scarce in the growth media. Our proof-of-concept systems offer  
67 inspiration for developing new cellular chassis that are more robust to nutrient fluctuations, as  
68 well as opening avenues to constrain the functional “shelf-life” of a cell by providing an internal  
69 amino acid reservoir with a limited capacity – akin to a biological battery.

70

## 71 **Results**

### 72 ***Assessing the proteolytic activities of E. coli and M. florum SsrA tags***

73 To gain an insight into the effectiveness of different proteolytic tags, we compared the activities  
74 of the *E. coli* and *M. florum* proteolysis systems by assembling genetic constructs where an  
75 *eGFP* (GFP) reporter gene was tagged with one of two proteolysis tags. Specifically, we used  
76 the *E. coli* (Ec; AANDENYALAA) and *M. florum* (Mf;  
77 AANKNEENTNEVPTFMLNAGQANYAFA) SsrA tag sequences which were codon optimized  
78 for expression in *E. coli* (**Materials and Methods**) and fused these to the C-terminus of GFP  
79 whose expression was under the control of an isopropyl  $\beta$ -D-1-thiogalactopyranoside (IPTG)  
80 inducible promoter ( $P_{lac}$ ). In this way, GFP was synthesized bearing one of two peptide tags,  
81 targeting it for proteolytic degradation by each of our chosen systems (**Figure 1A**). Because  
82 the Mf tag is specifically recognized by its cognate Lon protease from *M. florum* (Mf-Lon),  
83 which is not present in *E. coli*, we also constructed a separate plasmid where a codon-  
84 optimized *lon* gene from *M. florum*<sup>12</sup> was expressed under the control of an arabinose-  
85 inducible promoter ( $P_{BAD}$ ).

86 To assess the performance of the two tags, we expressed untagged GFP, GFP-Ec, or  
87 GFP-Mf alone and simultaneously with Mf-Lon in *E. coli* BL21(DE3) cells and measured cell  
88 growth and fluorescence (**Figure S1**). We observed almost no fluorescence in cells  
89 expressing GFP-Ec compared to cells expressing untagged GFP (2.8% at 6 h), indicating that  
90 the *E. coli* tag was effective in targeting the tagged protein for degradation by endogenous  
91 proteases (**Figure 1B**). In contrast, GFP-Mf when expressed alone, saw reduced, though  
92 nevertheless substantial levels of GFP, suggesting that most, but not all, of this protein  
93 escaped the endogenous *E. coli* proteases (**Figure 1B**). This was confirmed with additional  
94 experiments where the Mf-Lon expressing plasmid was both absent and present,  
95 corroborating previous findings<sup>10,18</sup> (**Figure S2**). As expected, further induction of Mf-Lon  
96 protease caused a 76% drop in GFP-Mf fluorescence, supporting the notion that the Mf tag is  
97 specifically recognized (**Figure 1B**). The fluorescence observed from cells expressing the  
98 untagged GFP remained largely the same upon induction of the Mf-Lon protease,  
99 demonstrating the specificity of the protease for the Mf tag (**Figure S3**).

100 To further compare the efficiency of the Ec and Mf tags, we induced the expression of  
101 untagged GFP, GFP-Mf, or GFP-Ec and after 5 hours removed the inducer. After allowing for  
102 GFP maturation<sup>25</sup>, we then monitored the degradation rate of each GFP variant by the drop  
103 in fluorescence and calculated their half-lives (**Figure 1C,D; Materials and Methods**). The  
104 fluorescence levels of cells containing GFP-Ec remained low throughout, indicating that even  
105 strong expression rates could not overcome the endogenous protein degradation. From this  
106 data, we found that GFP, GFP-Ec and GFP-Mf to have half-lives of 565 min, 6 min and 56  
107 min, respectively. These numbers support the high efficiency of the endogenous *E. coli*  
108 proteases with half-lives being almost ten times shorter than when using the *M. florum* system.  
109 However, the Mf-tag did still cause an increased turnover rate, with GFP-Mf exhibiting a half-  
110 life less than a tenth of the untagged GFP.

111 To assess how general these results were, we further tested if each system functioned  
112 similarly in the industrially relevant *E. coli* BL21 (DE3) star strain, in which RNase E has been  
113 knocked out for higher mRNA stability (**Figure S4**). As expected, we observed longer half-  
114 lives for each tagged GFP of 14 min and 424 min for GFP-Ec and GFP-Mf, respectively, and  
115 virtually no measurable degradation of the untagged GFP which was likely due to the  
116 increased stability of mRNA in this strain (**Figure S4**).

117 We also explored the impact of amino acid recycling when a cell is further burdened  
118 by a large genetic regulatory circuit. We chose to use a large 3 input, 1 output genetic logic  
119 circuit called 0xF6 designed by the Cello software<sup>26</sup> and composed of 9 transcription factors.  
120 Our existing strains containing the untagged GFP and GFP-Ec were co-transformed with the  
121 pAN3938 plasmid encoding this circuit and an assessment of growth rate performed (**Figure**  
122 **S5**). As expected, growth rate was significantly reduced by the addition of the 0xF6 genetic

123 circuit. However, a large relative improvement in growth rate was observed for the GFP-Ec  
124 strain, with its growth rate being over double that of the GFP-nt strain. This suggests that cells  
125 already facing severe strain on internal resources see an even greater benefit to the recycling  
126 of foreign proteins.

127

### 128 ***Dynamic and targeted control of protein degradation using the *M. florum* SsrA system***

129 A potential advantage of using the *M. florum* SsrA tag system in *E. coli* for the recycling of  
130 amino acids is the ability to dynamically control its expression to coincide with an increased  
131 demand for resources (e.g., during starvation conditions). This reduces the strength at which  
132 tagged proteins acting as a reservoir of amino acids need to be expressed as their turn-over  
133 rate can be kept low to ensure long-term protein stability when recycling is not required. Such  
134 a method is not possible with the endogenous system as it is continually active and needed  
135 by the host cell. Therefore, stronger, and continual expression of the tagged protein is  
136 necessary to maintain a similar sized pool of reserve protein.

137 We carried out several time-course experiments to investigate the precise dynamics  
138 of the Mf-tag system in this context where GFP-Mf expression was induced at  $t = 0$  and Mf-  
139 Lon simultaneously induced or induced 1 or 2 hours after GFP-Mf induction (**Figure S6A**). We  
140 found that only simultaneously inducing Mf-Lon with GFP-Mf resulted in increased degradation  
141 of GFP-Mf, while sequential induction of Mf-Lon after 1 or 2 h caused barely noticeable drops  
142 in fluorescence (4% and 3%, respectively).

143 This result was unexpected given that Mf-Lon has been shown to function efficiently in  
144 *E. coli*<sup>10,18</sup>, but is likely due to the varying expression strengths of the GFP-Mf reporter and  
145 Mf-Lon protease, which reside on different plasmids and which are driven by different  
146 promoters (**Figure 1**). To test this theory, we carried out additional experiments where Mf-Lon  
147 expression was induced 2 hours before induction of GFP-Mf to allow further time for its  
148 accumulation (**Figure S6A**). We found that the initial increase in fluorescence when Mf-Lon  
149 was induced simultaneously with GFP-Mf, was negated when Mf-Lon was induced 2 hours  
150 prior, suggesting that expression and maturation of Mf-Lon occurs quickly, and efficient GFP  
151 degradation could occur. Nevertheless, the rate of fluorescence increase from 3 hours after  
152 GFP-Mf induction was almost identical (**Figure S6B**), indicating that the concentration of Mf-  
153 Lon achieved when expressed from a  $P_{BAD}$  promoter and medium-copy plasmid (p15A origin;  
154 ~10 copies per cell) is unable to significantly reduce GFP-Mf levels.

155

### 156 ***Recovering cell growth by amino acid recycling***

157 A major challenge when developing genetic circuits is managing the burden they place on  
158 shared cellular resources<sup>27-32</sup>. The expression of a genetic construct will sequester key  
159 cellular machinery like ribosomes and may exhaust amino acid supplies, which in turn can

160 impact overall cell physiology and protein synthesis<sup>33–36</sup>, alter translation dynamics<sup>28</sup> and  
161 trigger stress responses<sup>37,38</sup>. A reason for this large impact is that circuit components are often  
162 strongly expressed and designed to be highly stable, causing a large portion of the cell's  
163 resources to become locked away from endogenous processes. Several studies have  
164 engineered ways to mitigate the burden placed on the cell by limiting recombinant protein  
165 expression via negative feedback loops, or reducing translational demand by splitting  
166 recombinant protein synthesis between endogenous and orthogonal ribosomes<sup>30,37,39</sup>.  
167 However, it has also been observed that supplementing the growth media of cells expressing  
168 recombinant proteins with amino acids can enhance growth rate and protein production<sup>38</sup>.  
169 Consequently, we hypothesized that by increasing amino acid turnover of heterologous  
170 protein products through targeted proteolysis, we would be able to help mitigate the burden a  
171 genetic circuit places on its host cell.

172 To test this idea, we measured the growth rate of cells expressing tagged and  
173 untagged GFP under the control of the same strong  $P_{lac}$  promoter (**Figure 1A**). We reasoned  
174 that the expression of the tagged GFP would place less of a burden on the host compared to  
175 the untagged version, due to increased recycling of amino acids<sup>27,38,40</sup>. Although the  
176 expression of any GFP protein will reduce cell growth rate, the reduction in growth rate for the  
177 first three hours of induction was smaller for cells expressing GFP-Ec (41%) and GFP-Mf with  
178 Mf-Lon (37%), compared to cells expressing untagged GFP (51%) (**Figure S7**). This suggests  
179 that while the expression of a recombinant protein will always cause a burden, this burden is  
180 partially alleviated by more effective recycling of these products which makes these resources  
181 accessible to endogenous processes.

182 It is known that protein degradation is elevated under various stress conditions,  
183 possibly as a way to increase the availability of amino acids for synthesis of stress-related  
184 proteins<sup>19,41</sup>. Furthermore, as part of the *E. coli* stringent response to nutrient limitations, there  
185 is an increase in the level of amino acid biosynthesis enzymes, to meet the demand for amino  
186 acids<sup>42</sup>. So next, we asked whether the potential benefit of using tagged proteins might  
187 increase when the host cell experienced nutrient related stress. We reasoned that increased  
188 recycling of a heterologous pool of proteins could benefit a host cell where nutrients to  
189 synthesize amino acids had become scarce in the environment.

190 To assess the feasibility of this approach, we developed a simple mathematical model  
191 to capture the key flows of a hypothetical essential resource in the cell (e.g., an amino acid  
192 the cell is unable to synthesize) and its impact on cell growth (**Figure 2A**). The model  
193 consisted of three ordinary differential equations that track the concentrations of a shared  
194 resource that is either available for use within the cell ( $N_c$ ), is actively in use by endogenous  
195 proteins ( $P_e$ ), or is locked up in foreign heterologous proteins ( $P_f$ ):



$$196 \quad \frac{dN_c}{dt} = r_i N_e + r_r P_f - N_c (r_f + r_e + \mu), \quad (1)$$

$$197 \quad \frac{dP_e}{dt} = r_e N_c - P_e \mu, \quad (2)$$

$$198 \quad \frac{dP_f}{dt} = r_f N_c - P_f (r_r + \mu). \quad (3)$$

199 Here,  $N_e$  is the external resource concentration outside the cell with a cellular import rate of  $r_i$ ,  
200  $r_e$  and  $r_f$  are the rates that available resources within the cell are converted into endogenous  
201 or heterologous proteins, respectively, and  $r_r$  is the recycling rate of the heterologous proteins  
202 (e.g., due to targeted proteolysis). Cellular growth and the associated dilution (by cell division)  
203 of all resources was captured by  $\mu = 0.1P_e$ . Parameters were chosen such that overall growth  
204 rate of the cell was consistent with *E. coli* data (i.e., having a division time ~25 min) and that  
205 relative internal transport, production and degradation rates were biologically realistic  
206 **(Materials and Methods)**.

207 Using this model, we simulated cells expressing tagged and untagged proteins (**Figure**  
208 **2B**) and exposed these cells to several external environmental shifts to temporally vary the  
209 resources available (**Figure 2C**). In the first shift, we removed all resources from the  
210 environment at 500 min, and in the second, at the same time point, we applied an oscillating  
211 external nutrient concentration. In both cases, we compared cells not producing any  
212 heterologous protein (i.e.,  $r_f = 0$ ) to those producing a recombinant protein that is subsequently  
213 recycled for reuse by the cell. We then measured their response in terms of growth rate  
214 normalized to when the external nutrient was continually present (i.e., the steady state growth  
215 rate when  $N_e = 1$ ). In both cases, the model showed a reduction in the relative impact on  
216 growth rate to changes in environmental availability (**Figure 2C**), demonstrating the ability for  
217 a recycled internal reservoir of a heterologous resource to act as a backup source that can  
218 help buffer the cell temporarily from environmental change. It should be noted that inclusion  
219 of a heterologous resource pool and its recycling does have an impact on cellular growth rate.  
220 However, for some applications (e.g., excitable systems that are sensitive to even minor  
221 fluctuations in cellular behaviors<sup>43</sup>, it may be preferable to have a more consistent  
222 performance when faced with environmental variability.

223 Even though our previous experiments had shown a limited capacity to dynamically  
224 vary protein degradation rates, we also explored how future controllable amino acid recycling  
225 systems might compare to a simpler system where foreign proteins are continually recycled.  
226 We ran simulations of our model where no foreign protein pool was present ('Wild-type';  $r_f =$   
227  $0$ ) and where a foreign protein pool was continually recycled ('AA recycling') or only recycled  
228 upon removal of nutrient from the environment ('Controlled AA recycling'). We allowed each  
229 system to reach an initial steady state with the external nutrient present (i.e.,  $N_e = 1$  until  $t =$   
230 500 min), then provided alternating time periods where the nutrient was completely removed



231 from the environment (i.e.,  $N_e = 0$ ) and then made available again. We tracked the varying  
232 growth rate over time to assess the impact on the cells (**Figure 2D**).

233 As expected, wild-type cells displayed large drops in growth rate upon removal of  
234 external nutrient that was proportional to the length of the removal period and fast recovery  
235 was seen upon reintroduction of the external nutrient. Activation of constant recycling saw a  
236 minor reduction in growth rate compared to the wild-type cells. However, this allowed for the  
237 drop in growth rate upon nutrient removal to be a smaller fraction of the initial growth rate. In  
238 contrast, controlled amino acid recycling that was active only when the essential nutrient was  
239 removed from the environment showed two different features. First, because recycling was  
240 only active upon removal of the external nutrient, for normal conditions there was no recycling  
241 of the foreign protein and so a larger impact was seen on the normal growth rate compared to  
242 when continual recycling was used (e.g., lower initial normalized growth rates for blue lines in  
243 **Figure 2D**). Second, removal of the external nutrient led to a transient increase in growth rate  
244 as recycling was activated. However, as the pool of foreign protein was consumed the growth  
245 rate also then began to drop. If the period of nutrient switching was short enough though, it  
246 was possible for no reduction below the initial growth rate to be seen (e.g., blue lines in bottom  
247 panel of **Figure 2D**).

248 We also generated heat maps showing the percentage drops in growth rate from an  
249 initial steady-state growth rate where the essential nutrient was abundant in the environment  
250 (i.e.,  $N_e = 1$ ) for varying recycling rates ( $r_r$ ) and periods of removal from the environment,  
251 across both low and high rates of foreign protein production ( $r_f$ ). These simulations revealed  
252 that as expected, when no foreign protein production is present, growth rate drops with the  
253 length of time (period) the essential nutrient is removed from the environment (**Figure 2E**).  
254 The expression and continual recycling of a foreign protein was able to reduce these drops in  
255 growth rate, and this effect was enhanced if the internal pool of foreign protein was sufficiently  
256 large and recycled at a sufficiently high rate (i.e., high  $r_r$  and  $r_f$ ). For the controlled amino acid  
257 recycling, we found that for particular combinations of foreign protein production and recycling  
258 rates and shorter periods of nutrient removal, drops in growth rate could be completely  
259 eradicated (white regions in **Figure 2E**). This suggests that controlled amino acid recycling (if  
260 sufficiently rapid) is a feasible strategy for completely shielding a cell from environmental  
261 nutrient fluctuations. However, trade-offs in the size of the internal foreign protein pool and the  
262 rate of recycling affect the ability to robustly respond to differing lengths of nutrient fluctuation.

263

### 264 **Buffering auxotrophic cells from environmental amino acid fluctuations**

265 To test some of the model predictions, we used auxotrophic *E. coli* strains RF10<sup>44</sup> ( $\Delta lysA$ )  
266 and ML17<sup>45</sup> ( $\Delta glnA$ ), which are unable to synthesize lysine and glutamine, respectively. This  
267 allowed us to tightly control endogenous amino acid levels by modulating the external supply

268 in the media. Furthermore, lysine and glutamine are amongst the most abundant amino acids  
269 in our GFP reporter (8.4% and 6.7% of the total amino acid composition, respectively) offering  
270 suitable reservoirs of these key resources. We initially tested the ability of the endogenous Ec  
271 tag system to enhance cell growth as we had previously found that it resulted in faster  
272 degradation of GFP compared to the orthogonal Mf tag system. We grew each of the strains  
273 expressing untagged GFP and GFP-Ec in nutrient-rich media to allow for a buildup of the  
274 recombinant protein. Following this, cells were switched to minimal media, effectively  
275 removing the source of all external amino acids, and for our auxotrophic strains, completely  
276 removing access to lysine and glutamine, respectively.

277 Consistent with our model predictions, we found that both strains expressing GFP-Ec  
278 exhibited a higher growth rate than cells expressing untagged GFP; 0.068 and 0.044 h<sup>-1</sup> for  
279 GFP-Ec versus 0.044 and 0.022 h<sup>-1</sup> for GFP-nt for the  $\Delta lysA$  and  $\Delta glnA$  strains, respectively.  
280 This equated to an increase in growth rate of 35% and 50% for the  $\Delta lysA$  and  $\Delta glnA$  strains,  
281 respectively (**Figure 3A-B**). We suspect the higher growth rates are due to the degradation of  
282 GFP-Ec, which is supported by the lower fluorescence levels (**Figure 3C**). Addition of lysine  
283 or glutamine (7 mM) to the medium for the respective untagged GFP expressing auxotrophic  
284 strains saw a marked increase in cell growth rate from 0.068 to 0.096 h<sup>-1</sup> for the  $\Delta lysA$  strain  
285 when lysine was present, and from 0.022 to 0.09 h<sup>-1</sup> for the  $\Delta glnA$  strain when glutamine was  
286 present (**Figure 3B**). This indicated that glutamine and lysine were the major limiting factors  
287 for cell growth and that recycling of the internal heterologous protein reservoir was able to  
288 partially buffer this impact (25% and 24% recovery for  $\Delta lysA$  and  $\Delta glnA$ , respectively).

289 Having shown that using the native *E. coli* tag could render cells more robust in the  
290 face of amino acid limitations, we next investigated whether the same effect could be seen  
291 when using the orthogonal Mf tag system. As mentioned previously and shown by our  
292 modelling, an orthogonal system would confer benefits over the endogenous one as it could  
293 target degradation in a dynamic and controllable manner. Again, we grew strains co-  
294 expressing untagged GFP and Mf-Lon, or GFP-Mf and Mf-Lon in rich media, before switching  
295 them to minimal media to eliminate external sources of nutrients. We observed a higher growth  
296 rate in both strains when expressing GFP-Mf compared to untagged GFP (0.034 and 0.028  
297 h<sup>-1</sup> for GFP-Mf versus 0.015 and 0.006 h<sup>-1</sup> for GFP-nt for the  $\Delta lysA$  and  $\Delta glnA$  strains,  
298 respectively). The increase in growth of 56% for the  $\Delta lysA$  strain and 79% for the  $\Delta glnA$  strain  
299 corroborated our findings from the model and endogenous tag system (**Figure 4**). This again  
300 could be attributed to the degradation of GFP-Mf as indicated by the lower fluorescence levels  
301 (**Figure 4C**). We also found that addition of 10 mM lysine or glutamine to the medium  
302 recovered the growth of cells expressing untagged GFP and Mf-Lon; 0.015 h<sup>-1</sup> increased to  
303 0.029 h<sup>-1</sup> in the  $\Delta lysA$  strain, and 0.006 h<sup>-1</sup> increased to 0.028 h<sup>-1</sup> in the  $\Delta glnA$  strain (**Figure**  
304 **4**). In contrast to the previous results, the amino acid supplement did not improve the growth

305 of cells expressing the tagged GFP, despite the high concentration (10 mM instead of 7 mM),  
306 suggesting that maximum cell growth was achieved under these conditions.

307 We also found that cells expressing both GFP-Mf and Mf-Lon grew faster than cells  
308 expressing only GFP-Mf (**Figure 5A-B**). The induction of the Mf-Lon protease enhanced  
309 growth of both the  $\Delta lysA$  and  $\Delta glnA$  strains; 0.034 and 0.028 h<sup>-1</sup>, respectively, compared to  
310 where GFP-Mf alone was expressed; 0.024 and 0.008 h<sup>-1</sup>, respectively. This suggests that  
311 the benefits of increased protein degradation (**Figure 5C**), and therefore a higher level of  
312 amino acid recycling, outweigh the cost of expressing two recombinant proteins – the reporter  
313 and the protease. Indeed, upon Mf-Lon protease induction, we observed an increase in growth  
314 of 29% and 71% for the  $\Delta lysA$  and  $\Delta glnA$  strains, respectively, providing support for increased  
315 amino acid recycling within cells enhancing their robustness to nutrient stress. Interestingly,  
316 we saw that the  $\Delta glnA$  strain grew slower in general than the  $\Delta lysA$  strain (**Figures 3-5**). This  
317 may be due to the fact that glutamine is more common in the *E. coli* proteome than lysine<sup>46</sup>.  
318 Therefore, a lack of endogenous glutamine would have a greater effect on cellular growth  
319 when external nutrients were limited, than a lack of endogenous lysine.

320 Together, these results show that targeted degradation of heterologous proteins can  
321 be beneficial to cells experiencing severe nutrient stress and be used to buffer growth rate  
322 from fluctuations in intracellular levels of amino acids.

323

## 324 Discussion

325 In this work, we have directly compared the effectiveness of the endogenous *E. coli* proteolysis  
326 system and a similar heterologous system from *M. florum*, and characterized them with the  
327 goal of using them as mechanisms for promoting targeted amino acid recycling within *E. coli*  
328 cells (**Figure 1**)<sup>8,12</sup>. We found that the endogenous system was approximately ten times more  
329 effective than the *M. florum* system, shortening the half-life of untagged GFP almost 100-fold,  
330 and similar results were observed in a second *E. coli* BL21(DE3) star strain, indicating the  
331 transferability of this approach. We also observed some crosstalk between these systems,  
332 with the reporter protein containing the *M. florum* tag also seeing increased degradation  
333 compared to an untagged reporter when the cognate Mf-Lon protease was not present. While  
334 characterization of these systems has been performed independently<sup>8,10,11,18,47</sup>, we believe  
335 this study to be the first that directly compares these systems targeting an identical target  
336 protein and functioning within the same host cell context.

337 In addition, we explored the option to activate targeted degradation by externally  
338 inducing expression of the *M. florum* system dynamically over time. However, we found that  
339 dynamic expression of the Mf-Lon protease in our system was unable to have a significant  
340 effect on GFP levels unless the protease was simultaneously induced or induced prior to the

341 target protein (**Figure S6**). This was likely due to the use of different plasmid backbones with  
342 different plasmid copy numbers, resulting in strong expression of GFP-Mf that Mf-Lon could  
343 not overcome. We also studied the effect of proteolysis tags when the host cell contained a  
344 large genetic circuit, and found that the Ec tag remained effective and even allowed for a better  
345 growth rate of cells (**Figure S5**).

346 Numerous strategies have been developed to mitigate the burden that genetic circuits  
347 and strong heterologous protein expression places on a host cell, including use of negative  
348 regulators, stress feedback sensors, and orthogonal ribosomes<sup>30,37,39</sup>. In our study, we asked  
349 whether the genetic circuit burden could be mitigated by using proteolysis tags to stimulate a  
350 higher turnover rate of amino acids which could be used for the synthesis of endogenous  
351 proteins. We found that the reduction in growth rate of cells was indeed smaller when they  
352 expressed a tagged protein (**Figure S7**), providing evidence for the benefits of using  
353 proteolysis tags when expressing recombinant proteins. Based on these findings, we  
354 developed a model that further explored the role that proteolysis could play, specifically under  
355 nutrient stress. The model showed that benefits would be amplified when facing external  
356 amino acid shortages, especially when activation of proteolysis could be triggered only when  
357 necessary (**Figure 2**). Finally, by using auxotrophic strains, we were able to show that recycled  
358 heterologous proteins could act as a limited reservoir of amino acid resources, both when  
359 using the endogenous and orthogonal tag systems, helping buffer the cell from fluctuations in  
360 nutrient availability and partially recover cell growth (**Figures 3 and 4**). We also found that the  
361 benefits of constant proteolysis outweighed the costs of expressing two recombinant proteins  
362 (**Figure 5**), emphasizing the importance of resource recycling to cells exposed to nutrient  
363 stress.

364 As our ambitions in synthetic biology grow and we begin to consider the construction  
365 of entire synthetic cells, understanding how resources flow and are recycled within these  
366 systems will become crucial. Our demonstration of the benefits of proteolysis tags as a means  
367 for amino acid recycling opens new avenues for other approaches controlling nutrient fluxes  
368 within a cell and provides a fresh perspective on the use of internal pools of heterologous  
369 proteins (or other resources) that can be released when needed to alleviate potential  
370 environmental fluctuations. This methodology can be used to help buffer the cell and our  
371 engineered genetic systems from the unavoidable variability that is present within real-world  
372 environments and paves the way for creating more reliable and robust biosystems.

373

## 374 **Materials and Methods**

### 375 ***Bacterial strains, media, and cloning***

376 The *E. coli* strain DH5 $\alpha$  ( $\phi$ 80*dlacZ*  $\Delta$ M15  $\Delta$ (*lacZYA-argF*)U169 *deoR recA1 endA1 hsdR17rK-*  
377 *mK+ phoA supE44  $\lambda$ - thi-1*) was used for plasmid construction and cloning, and the strains  
378 BL21(DE3) (*F – ompT hsdSB (rB– mB–) gal dcm (DE3)*) and BL21(DE3) star (*F – ompT*  
379 *hsdSB (rB– mB–) gal dcm rne131 (DE3)*) used for characterisation of our genetic systems.  
380 Cells were grown in Luria-Bertani (LB) media (Roth, #X968.4), or minimal media (12.8 g/l  
381 Na<sub>2</sub>HPO<sub>4</sub>·7H<sub>2</sub>O, 3 g/l KH<sub>2</sub>PO<sub>4</sub>, 1 g/l NH<sub>4</sub>Cl, 2 mM MgSO<sub>4</sub>, 0.1 mM CaCl<sub>2</sub>, 0.4% glucose). 100  
382 mg/ml ampicillin (Sigma Aldrich, #A9393), 50 mg/ml kanamycin (Sigma Aldrich #K1377), or  
383 34 mg/ml chloramphenicol (Sigma Aldrich, #C0378) were used as selection markers for  
384 cloned plasmids. Enhanced green fluorescent protein (eGFP) in the pET16b vector under the  
385 IPTG-inducible *Lac* promoter system was C-terminally tagged with the *E. coli* (Ec) tag through  
386 site directed mutagenesis: overlap PCR primers were designed which contained the Ec tag  
387 sequence. These were phosphorylated and used for PCR with the plasmid backbone. The  
388 product was digested with *DpnI* (NEB, #R0176S) overnight, and the resulting product PCR  
389 purified. A ligation was carried out to circularise the vector, using 10-50 ng of DNA and T4  
390 DNA ligase (Thermo Fisher, #EL0011), according to the manufacturer's instructions. The  
391 resulting plasmid was transformed into competent DH5 $\alpha$  cells. The *M. florum* tag was codon  
392 optimized for expression in *E. coli* by selecting the most highly abundant codons in *E. coli* for  
393 the corresponding amino acids (codon sequence: GCT GCA AAC AAG AAC GAG GAA AAC  
394 ACC AAC GAA GTA CCG ACC TTC ATG CTG AAC GCA GGC CAG GCT AAC TAT GCA  
395 TTC GCA), and GFP was C-terminally tagged with the Mf tag using a digest-and-ligate  
396 approach: oligonucleotides were designed to contain the Mf tag sequence, and annealed to  
397 create double-stranded DNA fragments, then phosphorylated. The pET16b-eGFP vector was  
398 digested with fast digest *BsrGI* and *XhoI* (NEB, #R0102S and #R0146S) and used in a ligation  
399 reaction with the inserts (3:1 ratio) using T4 DNA ligase (Thermo Fisher, #EL0011), at 22°C  
400 for 4–6 h. Competent DH5 $\alpha$  cells were transformed with the resulting product. The *M. florum*  
401 Lon protease from the pBAD33 vector (a gift from Robert Sauer; Addgene plasmid #21867)  
402 was subcloned into the pSB3C5 plasmid under the *araBAD* promoter using Golden Gate  
403 assembly. The primers for the PCR reaction were designed to flank the *Mf-Lon* with *BsmBI*  
404 restriction sites and include them into the vector (pSB3C5). The Golden Gate assembly  
405 reaction was set up, which included insert:vector in a 4:1 ratio, *BsmBI* (NEB, #R0739S), and  
406 1  $\mu$ l T4 DNA Ligase (Thermo Fisher, #EL0011). The following conditions were used for the  
407 reaction: 60 cycles of 42°C for 3 min then 16°C for 4 min, followed by 50°C for 5 min and 80°C  
408 for 5 min. The resulting product was transformed into *E. coli* DH5 $\alpha$  cells. The pAN3938 plasmid  
409 encoding the 0xF6 genetic logic circuit<sup>26</sup> was a gift from Christopher Voigt, and  
410 electrocompetent BL21 cells were co-transformed with either the GFP-Ec or GFP-nt plasmids,  
411 and the pAN3938 plasmid.

412



413 ***Proteolysis tag activity assays***

414 Overnight cultures of BL21(DE3) or BL21(DE3) star cells transformed with pET16b-eGFP-no  
415 tag, pET16b-eGFP-Ec, or pET16b-eGFP-Mf and pSB3C5-mfLon were grown for 12-16 h at  
416 37°C 250 rpm, then re-suspended in minimal media with appropriate antibiotics for selection.  
417 The cultures were grown to an OD<sub>600</sub> of 0.4–0.6, then induced with 0.5 mM IPTG (Roth,  
418 #2316.3) or 0.2% (w/v) arabinose (Roth, #5118.2). 1% glucose was added to the cultures  
419 expressing untagged proteins, to prevent basal expression from the pET16b vector<sup>48</sup>. For  
420 degradation assays, cells were pelleted 5 h after induction, washed twice in 1X phosphate-  
421 buffered saline (PBS) (137 mM NaCl, 2.7 mM KCl, 10 mM Na<sub>2</sub>HPO<sub>4</sub>, 1.8 mM KH<sub>2</sub>PO<sub>4</sub>) then  
422 re-suspended in minimal medium containing the relevant antibiotics, without IPTG. In cultures  
423 co-transformed with two plasmids, IPTG induction was stopped, but the second inducer, 0.2%  
424 (w/v) arabinose, was added to the medium to induce expression of Mf-Lon. 200 µl of the  
425 cultures were grown in a 96-well flat-bottom black plate with clear bottom (Corning, Sigma  
426 Aldrich #CLS3603-48EA) at 37°C with orbital shaking in a multimode microplate reader (Tecan  
427 Spark). Optical density (at 600 nm) and fluorescence measurements (excitation and emission  
428 wavelengths of 472 nm and 517 nm, respectively, with a gain of 50) were recorded at discrete  
429 intervals. Fluorescence was normalised to the OD<sub>600</sub> value (a.f.u./OD<sub>600</sub>). Untransformed  
430 BL21(DE3) cells were used as a negative control and their normalised autofluorescence  
431 values (a.f.u./OD<sub>600</sub>) were subtracted from the normalised fluorescence values (a.f.u./OD<sub>600</sub>) of  
432 the cells in different conditions.

433

434 ***Auxotrophic strain and starvation assays***

435 The RF10 ( $\Delta$ lysA) and ML17 strains ( $\Delta$ glnA) (a gift from Robert Gennis & Toshio Iwasaki  
436 Addgene plasmids #62076 and #61912) were transformed with the plasmids developed in this  
437 work and grown in LB to an OD<sub>600</sub> of ~0.3. For cells transformed with GFP-nt and GFP-Ec,  
438 GFP expression was induced with 0.5 mM IPTG for 1 h. For cells transformed with GFP-Mf  
439 and Mf-Lon, or GFP-nt and Mf-Lon, GFP expression was induced with 0.5 mM IPTG and Lon  
440 expression induced with 0.2% (w/v) arabinose for 1 h. After this, cells were pelleted, washed  
441 in 1X PBS, and re-suspended in minimal medium containing appropriate antibiotics for  
442 plasmid selection with additional 0.5 mM IPTG to maintain GFP expression, or 0.5 mM IPTG  
443 and 0.2% (w/v) arabinose to maintain GFP and Mf-Lon expression. Additionally, 7 or 10 mM  
444 of lysine (Sigma Aldrich, #L5501) or glutamine (Serva, #22942) were added to positive control  
445 samples. The OD<sub>600</sub> value and fluorescence were then measured as described above using a  
446 microplate reader every 10 min over 12 h.

447

448 ***Data analysis***

449 Python version 3.9.5 and packages matplotlib version 3.3.2, NumPy version 1.19.2, and SciPy  
450 version 0.13 were used to fit the degradation data to a first order decay function of the form,  
451  $N(t) = 100e^{-\lambda t}$ , where  $N(t)$  is the percentage of remaining fluorescence at time  $t$  post the start  
452 of the degradation curve, and  $\lambda$  the decay constant. The half-life of GFP was then given by  
453  $t_{1/2} = \ln(2)/\lambda$ . When investigating the dynamics of the Mf-tag system, the rate of GFP production  
454 ( $F$ ) was calculated as the gradient of fluorescence values normalized to OD<sub>600</sub> between 3 and  
455 7 h after induction (**Figure S6**). To obtain values for the growth rate of cells expressing tagged  
456 or untagged GFP, the slope of a linear fit to the growth curve (OD<sub>600</sub> measurements) was  
457 calculated between 3.5- 10 h (**Figure S5**), or 1–4 h (**Figure S7**). The growth rate of  
458 auxotrophic strains was calculated in the same way, between 5 and 12 h (**Figures 3-5**). To  
459 compare whether the growth rates of the auxotrophic strains were statistically significantly  
460 different, a 2-sample  $t$ -test was used.  $p < 0.05$  was considered as statistically significant. The  
461 statistical analysis was performed, and all plots and slopes of best fit were generated, using  
462 OriginLab Pro software (2019 version 64 bit).

463

#### 464 **Model parameterization and simulation**

465 Parameters for the model of resource allocation and use were selected based on the  
466 assumption that an external resource concentration of  $N_e = 1$  would lead to a realistic cell  
467 doubling time (~25 min) and that internal cellular rates would have biologically feasible relative  
468 values. This resulted in simulations with foreign protein recycling present being simulated with  
469 parameters:  $r_i = 0.015$ ,  $r_e = 0.02$ ,  $r_f = 0.2$ ,  $r_r = 0.01$ , and with  $\mu = 0.1 \times P_e$ . In all simulations,  
470 initial conditions for all states were set to 0, and the dynamics simulated for 500 min with  $N_e =$   
471 1.0 for the system to reach a steady state before any environmental fluctuations occurred. The  
472 model was simulated using Python version 3.9 and the SciPy version 0.13. The code for all  
473 simulations is available as **Supplementary Data 1**.

474

#### 475 **Supporting Information**

476 The effects of Ec and Mf proteolysis tags on cell fluorescence and growth (**Figure S1**); Off-  
477 target degradation by *E. coli* proteases on the Mf tag (**Figure S2**). The specificity of the Lon  
478 protease for the Mf tag (**Figure S3**). *E. coli* and *M. florum* proteolysis systems are effective  
479 among different *E. coli* strains (**Figure S4**). Programmed proteolysis allows for better cell  
480 growth when hosting burdensome genetic circuits (**Figure S5**). The dynamics of the *M. florum*  
481 proteolysis system (**Figure S6**). Expressing a tagged protein results in a smaller growth  
482 decrease than expressing an untagged protein (**Figure S7**).

483

#### 484 **Acknowledgements**



485 We thank Irem Avcilar-Kucukgoze for creating the original GFP-expressing plasmid, Robert  
486 Sauer for providing us with the pBAD33-mf-lon plasmid, and Robert Gennis and Toshio  
487 Iwasaki for providing us with the ML17 and RF10 *E. coli* strains. This work was supported by  
488 European Union's Horizon 2020 research and innovation program as part of the SynCrop ETN  
489 under the Marie Skłodowska-Curie grant 764591 (Z.I.), BrisSynBio, a BBSRC/EPSRC  
490 Synthetic Biology Research Centre grant BB/L01386X/1 (T.E.G.), a Royal Society University  
491 Research Fellowship grant UF160357 (T.E.G.), and a Turing Fellowship from The Alan Turing  
492 Institute under the EPSRC grant EP/N510129/1 (T.E.G.)

493

#### 494 **Author contributions**

495 Z.I. and T.E.G. conceived the study. K.S. performed all experiments and analyses. T.E.G.  
496 developed the mathematical model. Z.I. and T.E.G. supervised the work and discussed the  
497 data. All authors contributed to the writing of the manuscript.

498

#### 499 **Conflict of interest statement**

500 None declared.

## 501 References

- 502 1. Keller, K. C., Waller, P. R. H. & Sauer, R. T. (1996) Role of a peptide tagging system in  
503 degradation of proteins synthesized from damaged messenger RNA. *Science*.  
504 **271**(5251), 990–993
- 505 2. Farrell, C. M., Grossman, A. D. & Sauer, R. T. (2005) Cytoplasmic degradation of ssrA-  
506 tagged proteins. *Mol. Microbiol.* **57**(6), 1750–1761 3.
- 507 3. Maurizi, M. R. (1992) Production of abnormal proteins in *E. coli* stimulates transcription  
508 of lon and other heat shocks genes. *Trends biochem. Science.* **48**(10)
- 509 4. Gottesman, S. (2003) Proteolysis in Bacterial Regulatory Circuits. *Annual Review of*  
510 *Cell and Developmental Biology.* **19**, 565–587.
- 511 5. Chung, C. H. & Goldberg, A. L. (1981) The product of the lon (capR) gene in *Escherichia*  
512 *coli* is the ATP-dependent protease, protease La. *Proc. Natl. Acad. Sci. U. S. A.* **78**(81),  
513 4931–4935
- 514 6. Moore, S. D. & Sauer, R. T. (2007) The tmRNA system for translational surveillance  
515 and ribosome rescue. *Annual Review of Biochemistry.* **76**, 101–124.
- 516 7. Gottesman, S., Roche, E., Zhou, Y. & Sauer, R. T. (1998) The ClpXP and ClpAP  
517 proteases degrade proteins with carboxy-terminal peptide tails added by the SsrA-  
518 tagging system. *Genes Dev.* **12**, 1338-1347
- 519 8. Andersen, J. B., Sternberg, C., *et al.* (1998) New Unstable Variants of Green  
520 Fluorescent Protein for Studies of Transient Gene Expression in Bacteria. *Applied and*  
521 *Environmental Microbiology.* **64**(6), 2240-2246
- 522 9. Stricker, J., Cookson, S., *et al.* (2008) A fast, robust and tunable synthetic gene  
523 oscillator. *Nature* **456**(7221), 516–519
- 524 10. Cameron, D. E. & Collins, J. J. (2014) Tunable protein degradation in bacteria. *Nat.*  
525 *Biotechnol.* **32**(12), 1276–1281.
- 526 11. Chan, C. T. Y., Lee, J. W., Cameron, D. E., Bashor, C. J. & Collins, J. J. (2016)  
527 ‘Deadman’ and ‘Passcode’ microbial kill switches for bacterial containment. *Nature*  
528 *Chemical Biology.* **12**, 82–86
- 529 12. Gur, E. & Sauer, R. T. (2008) Evolution of the ssrA degradation tag in Mycoplasma:  
530 Specificity switch to a different protease. *Proc. Natl. Acad. Sci. U. S. A.* **105**(42), 16113–  
531 16118.
- 532 13. Ge, Z. & Karzai, A. W. (2009) Co-evolution of multipartite interactions between an  
533 extended tmRNA tag and a robust Lon protease in Mycoplasma. *Mol. Microbiol.* **74**(5),  
534 1083–1099.
- 535 14. Griffith, K. L. & Grossman, A. D. (2008) Inducible protein degradation in *Bacillus subtilis*  
536 using heterologous peptide tags and adaptor proteins to target substrates to the

- 537 protease ClpXP. *Mol. Microbiol.* **70**(4), 1012–1025.
- 538 15. Kim, Y. I., Burton, R. E., Burton, B. M., Sauer, R. T. & Baker, T. A. (2000) Dynamics of  
539 substrate denaturation and translocation by the ClpXP degradation machine. *Mol. Cell*  
540 **5**(4), 639–648.
- 541 16. McGinness, K. E., Baker, T. A. & Sauer, R. T. (2006) Engineering Controllable Protein  
542 Degradation. *Mol. Cell* **22**(5), 701–707.
- 543 17. Ahlawat, S. & Morrison, D. A. (2009) ClpXP degrades SsrA-tagged proteins in  
544 streptococcus pneumoniae. *J. Bacteriol.* **191**(8), 2894–2898.
- 545 18. Lv, L., Wu, Y., Zhao, G. & Qi, H. (2019) Improvement in the Orthogonal Protein  
546 Degradation in Escherichia coli by Truncated mf-ssrA Tag. *Trans. Tianjin Univ.* **25**(4),  
547 357–363.
- 548 19. Jozefczuk, S., Klie, S., *et al.* (2010) Metabolomic and transcriptomic stress response of  
549 Escherichia coli. *Mol. Syst. Biol.* **6**(364), 1–16.
- 550 20. Mahmoud, S. A. & Chien, P. (2018) Regulated Proteolysis in Bacteria. *Annual Review*  
551 *of Biochemistry.* **87** 677–696.
- 552 21. Kotula, J. W., Kerns, S. J., *et al.* (2014) Programmable bacteria detect and record an  
553 environmental signal in the mammalian gut. *Proc. Natl. Acad. Sci. U. S. A.* **111**(13),  
554 4838–4843.
- 555 22. Saltepe, B., Kehribar, E. Ş., Su Yirmibeşoğlu, S. S. & Şafak Şeker, U. Ö. (2018) Cellular  
556 Biosensors with Engineered Genetic Circuits. *ACS Sensors* **3**(1), 13–26.
- 557 23. Corbisier, P., Van Der Lelie, D., *et al.* (1999) Whole cell- and protein-based biosensors  
558 for the detection of bioavailable heavy metals in environmental samples. *Analytica*  
559 *Chimica Acta.* **387**(3) 235–244.
- 560 24. Cardinale, S. & Arkin, A. P. (2012) Contextualizing context for synthetic biology -  
561 identifying causes of failure of synthetic biological systems. *Biotechnology Journal* **7**  
562 856–866-
- 563 25. Macdonald, P. J., Chen, Y. & Mueller, J. D. (2012) Chromophore maturation and  
564 fluorescence fluctuation spectroscopy of fluorescent proteins in a cell-free expression  
565 system. *Anal Biochem* **421**(1), 291–298.
- 566 26. Nielsen, A. A. K., Der, B. S., *et al.* (2016) Genetic circuit design automation. *Science*  
567 **352**(6281), 53-65.
- 568 27. Glick, B. R. (1995) Metabolic load and heterologous gene expression. *Biotechnology*  
569 *Advances.* **13**(2), 247–261.
- 570 28. Goroehowski, T. E., Avciilar-Kucukgoze, I., Bovenberg, R. A. L., Roubos, J. A. &  
571 Ignatova, Z. (2016) A Minimal Model of Ribosome Allocation Dynamics Captures Trade-  
572 offs in Expression between Endogenous and Synthetic Genes. *ACS Synth. Biol.* **5**(7),  
573 710–720.

- 574 29. Gyorgy, A., Jimenez, J.I., *et al.* (2015) Isocost Lines Describe the Cellular Economy of  
575 Genetic Circuits. *Biophys. J.* **109**, 639–646.
- 576 30. Shopera, T., He, L., Oyetunde, T., Tang, Y. J. & Moon, T. S. (2017) Decoupling  
577 Resource-Coupled Gene Expression in Living Cells. *ACS Synth. Biol.* **6**, 1596–1604.
- 578 31. Carbonell-Ballester, M., Garcia-Ramallo, E., Montañez, R., Rodriguez-Caso, C. &  
579 Macía, J. (2016) Dealing with the genetic load in bacterial synthetic biology circuits:  
580 Convergences with the Ohm's law. *Nucleic Acids Res.* **44**, 496–507.
- 581 32. Boo, A., Ellis, T. & Stan, G. B. (2019) Host-aware synthetic biology. *Current Opinion in*  
582 *Systems Biology.* **14**, 66–72.
- 583 33. Ceroni, F., Algar, R., Stan, G. B. & Ellis, T. (2015) Quantifying cellular capacity identifies  
584 gene expression designs with reduced burden. *Nat. Methods* **12**(5), 415–418.
- 585 34. Kurland, C. G. & Dong, H. (1996) Bacterial growth inhibition by overproduction of  
586 protein. *Molecular Microbiology.* **21**(1) 1–4.
- 587 35. Vind, J., Sørensen, M. A., Rasmussen, M. D. & Pedersen, S. (1993) Synthesis of  
588 proteins in *Escherichia coli* is limited by the concentration of free ribosomes: Expression  
589 from reporter genes does not always reflect functional mRNA levels. *J. Mol. Biol.* **231**,  
590 678–688.
- 591 36. Dong, H., Nilsson, L. & Kurland, C. G. (1995) Gratuitous overexpression of genes in  
592 *Escherichia coli* leads to growth inhibition and ribosome destruction. *J. Bacteriol.* **177**,  
593 1497–1504.
- 594 37. Ceroni, F., Boo, A., *et al.* (2018) Burden-driven feedback control of gene expression.  
595 *Nat. Methods* **15**(5), 387–393.
- 596 38. Kumar, J., Chauhan, A. S., Shah, R. L., Gupta, J. A. & Rathore, A. S. (2020) Amino  
597 acid supplementation for enhancing recombinant protein production in *E. coli*.  
598 *Biotechnology and Bioengineering.* **117**(8), 2420–2433
- 599 39. Darlington, A. P. S., Kim, J., Jiménez, J. I. & Bates, D. G. (2018) Dynamic allocation of  
600 orthogonal ribosomes facilitates uncoupling of co-expressed genes. *Nat. Commun.* **9**,  
601 1–12.
- 602 40. Muhamadali, H., Xu, Y., *et al.* (2016) Molecular BioSystems Interfacing chemical  
603 biology with the-omic sciences and systems biology Metabolomic analysis of riboswitch  
604 containing *E. coli* recombinant expression system. *Mol. BioSyst* **12**, 350.
- 605 41. Sanchez-Vazquez, P., Dewey, C. N., Kitten, N., Ross, W. & Gourse, R. L. (2019)  
606 Genome-wide effects on *Escherichia coli* transcription from ppGpp binding to its two  
607 sites on RNA polymerase. *Proc. Natl. Acad. Sci. U. S. A.* **116**(17), 8310–8319.
- 608 42. Irving, S. E., Choudhury, N. R. & Corrigan, R. M. (2021) The stringent response and  
609 physiological roles of (pp)pGpp in bacteria. *Nature Reviews Microbiology.* **19**(4), 256–  
610 271.

- 611 43. Süel, G. M., Garcia-Ojalvo, J., Liberman, L. M. & Elowitz, M. B. (2006) An excitable  
612 gene regulatory circuit induces transient cellular differentiation. *Nature* **440**, 545–550.
- 613 44. Lin, M. T., Fukazawa, R., *et al.* (2015) Escherichia coli Auxotroph Host Strains for  
614 Amino Acid-Selective Isotope Labeling of Recombinant Proteins. *Methods in*  
615 *Enzymology*. **565**, 45–66.
- 616 45. Lin, M. T., Sperling, L.J., *et al.* (2011) A rapid and robust method for selective isotope  
617 labeling of proteins. *Methods* **55**(4), 370–378.
- 618 46. Spahr, P. F. (1962) Amino acid composition of ribosomes from Escherichia Coli. *J. Mol.*  
619 *Biol.* **4**(5), 395–406.
- 620 47. Butzin, N. C. & Mather, W. H. (2018) Crosstalk between Diverse Synthetic Protein  
621 Degradation Tags in Escherichia coli. *ACS Synth. Biol.* **7**(1), 54–62.
- 622 48. Grossman, T. H., Kawasaki, E. S., Punreddy, S. R. & Osburne, M. S. (1998)  
623 Spontaneous cAMP-dependent derepression of gene expression in stationary phase  
624 plays a role in recombinant expression instability. *Gene* **209**(1-2), 95–103.

625 **Figures and captions**

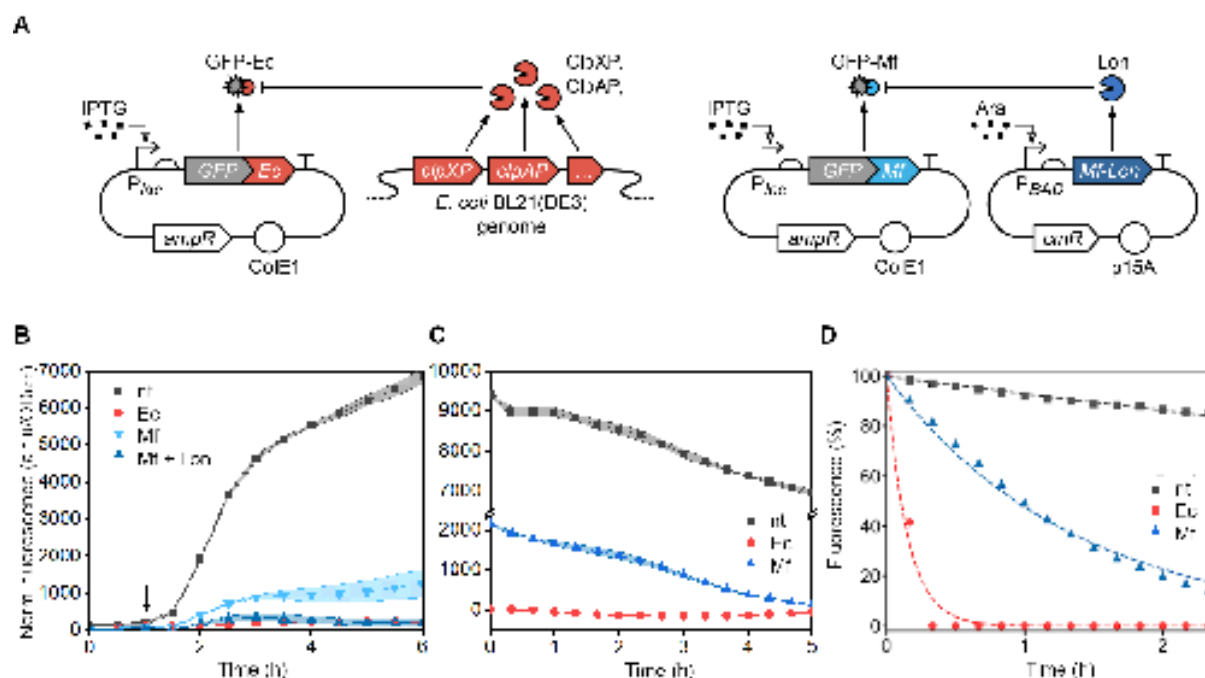

626

627 **Figure 1: *E. coli* and *M. florum* proteolysis systems used for targeted protein**  
 628 **degradation in *E. coli*.** (A) Schematic of the proteolysis systems. GFP is expressed with *E.*  
 629 *coli* (Ec) or *M. florum* (Mf) SsrA tags, which mark it for degradation by endogenous proteases,  
 630 or the orthogonal plasmid-borne Mf-Lon protease, respectively. (B) GFP fluorescence  
 631 normalized to cell density of *E. coli* BL21(DE3) cells expressing non-tagged GFP (nt), GFP-  
 632 Ec (Ec) or GFP-Mf without and with the co-expression of Mf-Lon (Mf and Mf + Lon,  
 633 respectively). Arrow indicates timepoint of GFP induction. (C) GFP fluorescence normalized  
 634 to cell density of cells expressing untagged GFP (nt), GFP-Ec (Ec), or GFP-Mf (Mf) after  
 635 removal of inducer, whilst maintaining Mf-Lon expression in the case of GFP-Mf. (D) %  
 636 Fluorescence normalized to the time of removal of the inducer of cells expressing untagged  
 637 GFP (nt), GFP-Ec (Ec), or GFP-Mf (Mf). Curves are fitted to first order exponential decay.  
 638 Data are means  $\pm$  SD ( $n = 3$  independent biological replicates).

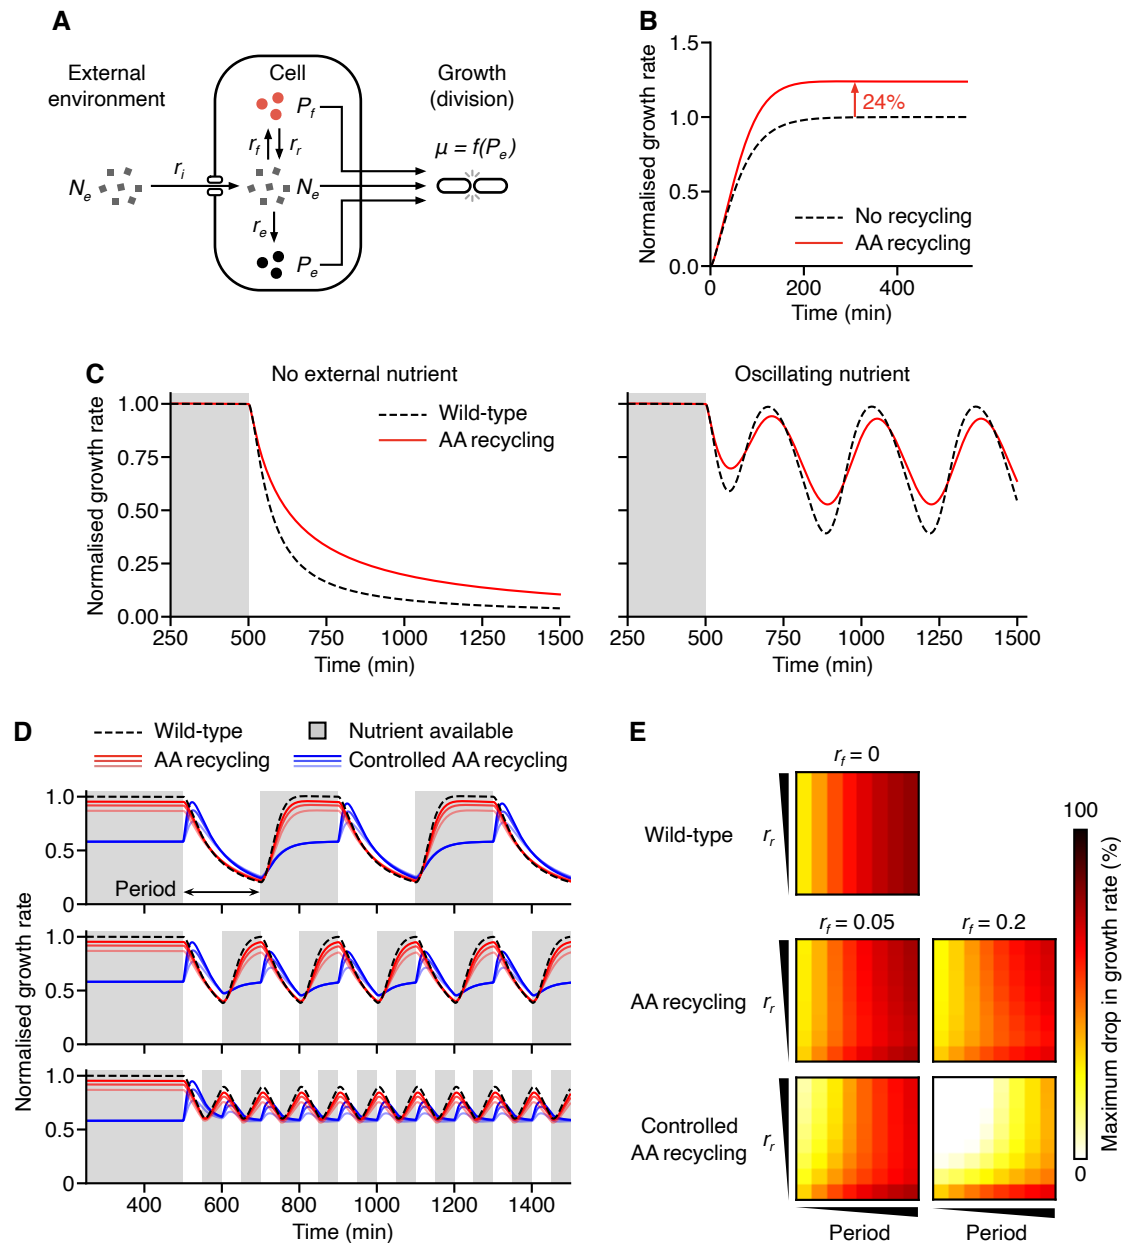

639

640 **Figure 2: Model capturing the benefits of amino acid recycling.** (A) Schematic of the  
 641 model.  $N_e$  denotes the external resource concentration,  $N_c$ ,  $P_e$  and  $P_f$  denote the concentration  
 642 of a key resource (i.e., an amino acid that cannot be natively produced), available within the  
 643 cell, locked up in endogenous or in heterologous proteins, respectively.  $r_i$  denotes the cellular  
 644 import rate of resources, which can be divided into  $r_e$ , the rate at which resources are  
 645 converted into endogenous proteins, and  $r_f$ , the rate at which resources are converted into  
 646 foreign recombinant proteins.  $\mu = f(P_e)$  captures cell growth and dilution of resources by cell  
 647 division. (B) Simulation of the normalized cell growth rate in a strain expressing recombinant  
 648 proteins, i.e. with no amino acid recycling, and in a strain expressing tagged foreign proteins,  
 649 i.e. with amino acid recycling. (C) Simulation of the effects of nutrient stress on normalized  
 650 cell growth rate expressing tagged proteins, i.e., with continual amino acid recycling ('AA



651 recycling'), and in a strain expressing no heterologous protein ('wild-type'). The external  
652 resource (nutrient) is continually present for the first 500 min (grey shaded region), then either  
653 removed completely, or oscillating nutrient levels are applied after this time. In all cases,  
654 growth rate is normalized to the steady state growth rate when the external resource is present  
655 (i.e.,  $N_e = 1$ ). **(D)** Time-series of normalized growth rate (to wild-type cells when the external  
656 resource is present) of cells exposed to a cycling of external nutrient absence (white regions)  
657 and presence (grey shaded regions). Responses shown for wild-type cells (black dashed line),  
658 cells with continual amino acid recycling (red lines;  $r_f = 0.1$  protein resource<sup>-1</sup> min<sup>-1</sup>, light-dark:  
659  $r_f = 0.1, 0.2, 0.4$  resource protein<sup>-1</sup> min<sup>-1</sup>), and cells where amino acid recycling is only active  
660 when external nutrient is absent (blue lines;  $r_f = 0.1$  protein resource<sup>-1</sup> min<sup>-1</sup>, light-dark:  $r_f =$   
661  $0.1, 0.2, 0.4$  resource protein<sup>-1</sup> min<sup>-1</sup>). Panels from top to bottom show varying length of period  
662 that nutrient is absent from the external environment. **(E)** Heat maps showing how varying  
663 foreign protein production ( $r_f = 0, 0.05, 0.2$  protein resource<sup>-1</sup> min<sup>-1</sup>) and recycling ( $r_r = 0.001,$   
664  $0.015, 0.029, 0.043, 0.057, 0.072, 0.086, 0.1$  resource protein<sup>-1</sup> min<sup>-1</sup>) rates, and period (25,  
665 50, 75, 100, 125, 150, 175, 200 min) of the nutrient/resource availability cycling (see panel D)  
666 affect the maximum percentage drop in the initial steady state growth rate when external  
667 nutrient is present.

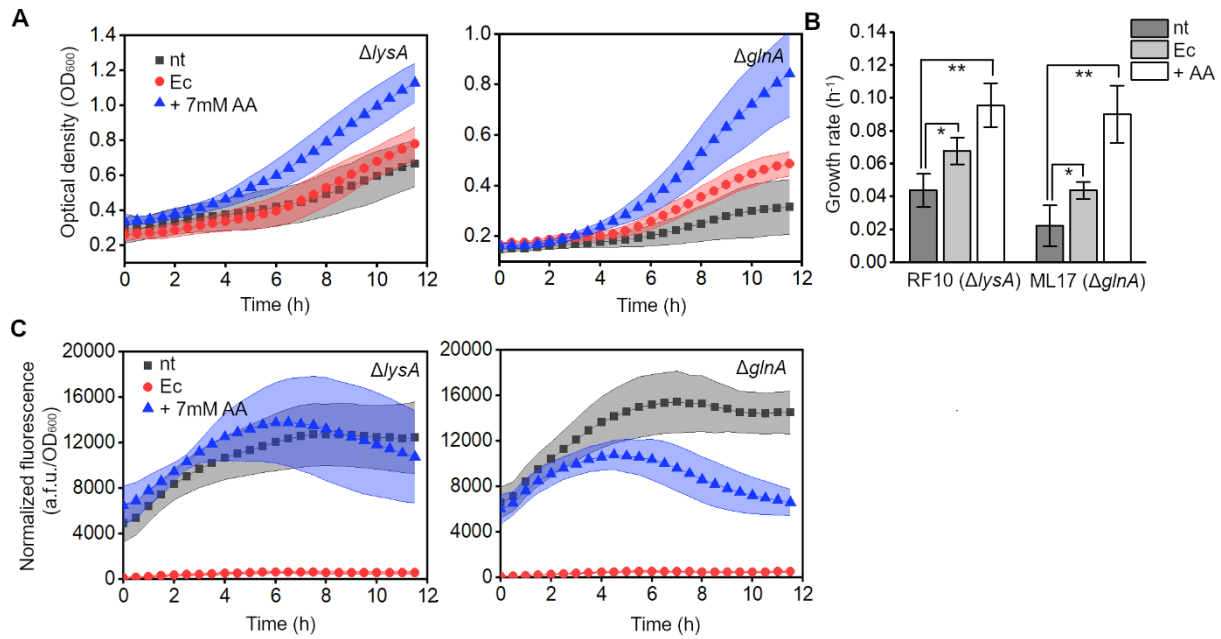

668

669

670

671

672

673

674

675

676

677

**Figure 3: Targeted GFP degradation provides amino acids to auxotrophic strains upon nutrient limitation.** (A) Growth of the RF10 ( $\Delta lysA$ ) and ML17 ( $\Delta glnA$ ) strains in minimal medium, expressing untagged GFP (nt) or GFP-Ec (Ec) with the addition of 7 mM lysine or glutamine supplement. Data are means  $\pm$  SD (B) Quantification of the growth rates,  $\mu$ , of cells, between 5–12 h of growth. (\* $p < 0.05$ , \*\* $p < 0.005$ , as compared to nt condition for each strain, with 2-sample t test). Data are means  $\pm$  SE (C) GFP fluorescence normalized to cell density of the RF10 ( $\Delta lysA$ ) and ML17 ( $\Delta glnA$ ) strains, expressing untagged GFP (nt) or GFP-Ec (Ec) with the addition of 7 mM lysine or glutamine supplement. Data are means  $\pm$  SD ( $n = 5$  independent biological replicates).

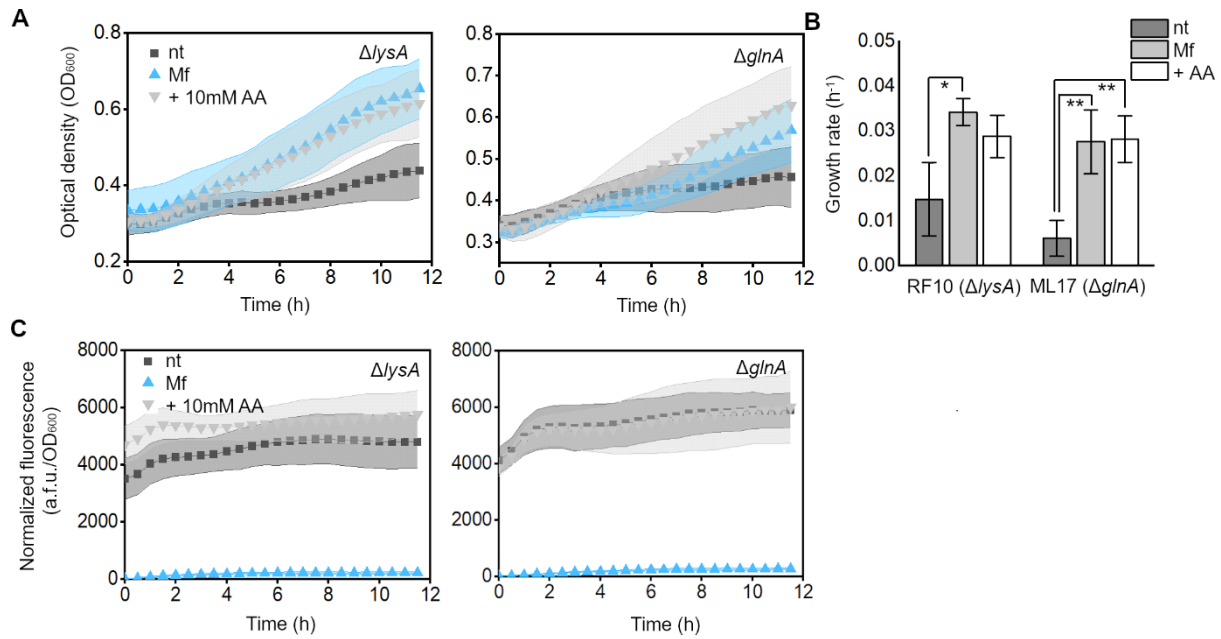

678

679

680

681

682

683

684

685

686

687

688

689

**Figure 4: Targeted GFP degradation using the foreign Mf tag system provides amino acids to auxotrophic strains upon nutrient limitation. (A)** Growth of the RF10 ( $\Delta lysA$ ) and ML17 ( $\Delta glnA$ ) strains in minimal medium, co-expressing untagged GFP and Mf-Lon (nt), GFP-Mf and Mf-Lon (Mf), or untagged GFP and Mf-Lon (nt) with the addition of 10mM lysine or glutamine supplement (+AA). Data are means  $\pm$  SD. **(B)** Quantification of the growth rates of cells, between 5–12 h of growth. (\* $p < 0.05$ , \*\* $p < 0.005$ , as compared to nt condition for each strain, with 2-sample  $t$ -test). Data are means  $\pm$  SE. **(C)** GFP fluorescence normalized to cell density of the RF10 ( $\Delta lysA$ ) and ML17 ( $\Delta glnA$ ) strains, co-expressing untagged GFP and Mf-Lon (nt), GFP-Mf and Mf-Lon (Mf), or untagged GFP and Mf-Lon (nt) with the addition of 10mM lysine or glutamine supplement (+AA). Data are means  $\pm$  SD ( $n = 5$  independent biological replicates).

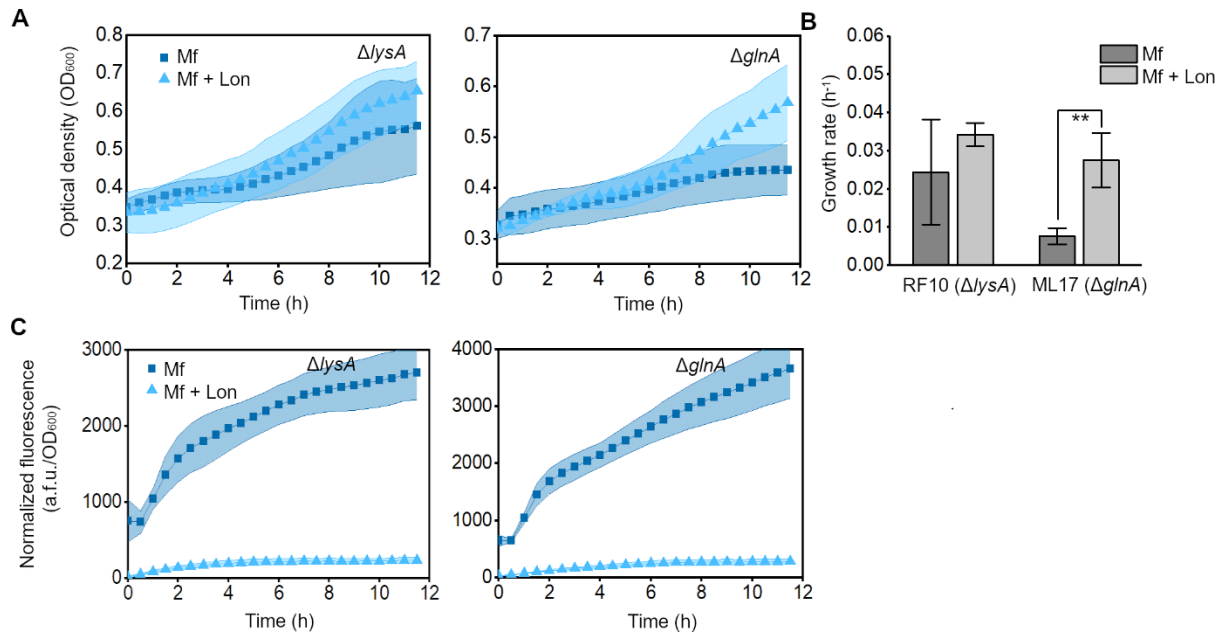

690

691

692

693

694

695

696

697

698

**Figure 5. Induction of the orthogonal Mf proteolysis system increases cell robustness against nutrient stress as a result of resource recycling. (A)** Growth of the RF10 ( $\Delta lysA$ ) and ML17 ( $\Delta glnA$ ) strains in minimal medium expressing GFP-Mf (Mf), or GFP-Mf and Mf-Lon (Mf + Lon). Data are means  $\pm$  SD. **(B)** Quantification of the growth rates of cells, between 5–12 h of growth. (\*\* $p < 0.005$ , as compared to Mf condition for each strain, with 2-sample t test). Data are means  $\pm$  SE. **(C)** GFP fluorescence normalized to cell density of the RF10 ( $\Delta lysA$ ) and ML17 ( $\Delta glnA$ ) strains expressing GFP-Mf (Mf), or GFP-Mf and Mf-Lon (Mf + Lon). Data are means  $\pm$  SD ( $n = 5$  independent biological replicates).
